# Supplementary material
Source: PubMed Central journal article supplement (PMC7612300)
Supplement: EMS140927-supplement-Extended_Data_Script.pdf [file EMS140927-supplement-Extended_Data_Script.pdf]

```

1151 Extended Data Script 1.
1152 import controlP5.*; //import ControlP5 library
1153 import processing.serial.*;
1154 Serial port;
1155 ControlP5 cp5; //create ControlP5 object
1156 PFont font;
1157 void setup(){ //same as arduino program
1158   size(800, 800); //window size, (width, height)
1159   printArray(Serial.list()); //prints all available serial ports
1160   port = new Serial(this, "COM1", 9600);
1161   cp5 = new ControlP5(this);
1162   font = createFont("Times New Roman", 20); // custom fonts for buttons and title
1163   cp5.addButton("DtoW") //alloff" is the name of button
1164   .setPosition(50, 50) //x and y coordinates of upper left corner of button
1165   .setSize(100, 75) //(width, height)
1166   .setFont(font)
1167   ;
1168   cp5.addButton("CtoW") //red" is the name of button
1169   .setPosition(50, 150) //x and y coordinates of upper left corner of button
1170   .setSize(100, 75) //(width, height)
1171   .setFont(font)
1172   ;
1173   cp5.addButton("BtoW") //red" is the name of button
1174   .setPosition(50, 250) //x and y coordinates of upper left corner of button
1175   .setSize(100, 75) //(width, height)
1176   .setFont(font)
1177   ;
1178   cp5.addButton("AtoW") //red" is the name of button
1179   .setPosition(50, 350) //x and y coordinates of upper left corner of button
1180   .setSize(100, 75) //(width, height)
1181   .setFont(font)
1182   ;
1183   cp5.addButton("Ato78") //red" is the name of button
1184   .setPosition(175, 50) //x and y coordinates of upper left corner of button
1185   .setSize(100, 75) //(width, height)
1186   .setFont(font)
1187   ;
1188   cp5.addButton("Ato112") //red" is the name of button
1189   .setPosition(175, 150) //x and y coordinates of upper left corner of button
1190   .setSize(100, 75) //(width, height)
1191   .setFont(font)
1192   ;
1193   cp5.addButton("AtoAll") //red" is the name of button
1194   .setPosition(350, 50) //x and y coordinates of upper left corner of button
1195   .setSize(100, 75) //(width, height)
1196   .setFont(font)
1197   ;
1198   cp5.addButton("BtoAll") //red" is the name of button
1199   .setPosition(350, 150) //x and y coordinates of upper left corner of button
1200   .setSize(100, 75) //(width, height)
1201   .setFont(font)

```

```
1202 ;
1203 cp5.addButton("CtoAll") // "red" is the name of button
1204     .setPosition(350, 250) // x and y coordinates of upper left corner of button
1205     .setSize(100, 75) // (width, height)
1206     .setFont(font)
1207 ;
1208 cp5.addButton("DtoA") // "aloff" is the name of button
1209     .setPosition(350, 350) // x and y coordinates of upper left corner of button
1210     .setSize(100, 75) // (width, height)
1211     .setFont(font)
1212 ;
1213 cp5.addButton("AtoF4") // "red" is the name of button
1214     .setPosition(475, 50) // x and y coordinates of upper left corner of button
1215     .setSize(100, 75) // (width, height)
1216     .setFont(font)
1217 ;
1218 cp5.addButton("BtoF4") // "red" is the name of button
1219     .setPosition(475, 150) // x and y coordinates of upper left corner of button
1220     .setSize(100, 75) // (width, height)
1221     .setFont(font)
1222 ;
1223 cp5.addButton("CtoF4") // "red" is the name of button
1224     .setPosition(475, 250) // x and y coordinates of upper left corner of button
1225     .setSize(100, 75) // (width, height)
1226     .setFont(font)
1227 ;
1228 cp5.addButton("DtoF4") // "aloff" is the name of button
1229     .setPosition(475, 350) // x and y coordinates of upper left corner of button
1230     .setSize(100, 75) // (width, height)
1231     .setFont(font)
1232 ;
1233 cp5.addButton("AtoL4") // "red" is the name of button
1234     .setPosition(600, 50) // x and y coordinates of upper left corner of button
1235     .setSize(100, 75) // (width, height)
1236     .setFont(font)
1237 ;
1238 cp5.addButton("BtoL4") // "red" is the name of button
1239     .setPosition(600, 150) // x and y coordinates of upper left corner of button
1240     .setSize(100, 75) // (width, height)
1241     .setFont(font)
1242 ;
1243 cp5.addButton("CtoL4") // "red" is the name of button
1244     .setPosition(600, 250) // x and y coordinates of upper left corner of button
1245     .setSize(100, 75) // (width, height)
1246     .setFont(font)
1247 ;
1248 cp5.addButton("DtoL4") // "aloff" is the name of button
1249     .setPosition(600, 350) // x and y coordinates of upper left corner of button
1250     .setSize(100, 75) // (width, height)
1251     .setFont(font)
1252 ;
```

```
1253 cp5.addButton("AllOn") // "aloff" is the name of button
1254     .setPosition(600, 600) // x and y coordinates of upper left corner of button
1255     .setSize(100, 75) // (width, height)
1256     .setFont(font)
1257 ;
1258 cp5.addButton("X1") // "aloff" is the name of button
1259     .setPosition(50, 450) // x and y coordinates of upper left corner of button
1260     .setSize(25, 25) // (width, height)
1261     .setFont(font)
1262 ;
1263 cp5.addButton("Y1") // "aloff" is the name of button
1264     .setPosition(50, 500) // x and y coordinates of upper left corner of button
1265     .setSize(25, 25) // (width, height)
1266     .setFont(font)
1267 ;
1268 cp5.addButton("X2") // "aloff" is the name of button
1269     .setPosition(85, 450) // x and y coordinates of upper left corner of button
1270     .setSize(25, 25) // (width, height)
1271     .setFont(font)
1272 ;
1273 cp5.addButton("Y2") // "aloff" is the name of button
1274     .setPosition(85, 500) // x and y coordinates of upper left corner of button
1275     .setSize(25, 25) // (width, height)
1276     .setFont(font)
1277 ;
1278 cp5.addButton("X3") // "aloff" is the name of button
1279     .setPosition(120, 450) // x and y coordinates of upper left corner of button
1280     .setSize(25, 25) // (width, height)
1281     .setFont(font)
1282 ;
1283 cp5.addButton("Y3") // "aloff" is the name of button
1284     .setPosition(120, 500) // x and y coordinates of upper left corner of button
1285     .setSize(25, 25) // (width, height)
1286     .setFont(font)
1287 ;
1288 cp5.addButton("X4") // "aloff" is the name of button
1289     .setPosition(155, 450) // x and y coordinates of upper left corner of button
1290     .setSize(25, 25) // (width, height)
1291     .setFont(font)
1292 ;
1293 cp5.addButton("Y4") // "aloff" is the name of button
1294     .setPosition(155, 500) // x and y coordinates of upper left corner of button
1295     .setSize(25, 25) // (width, height)
1296     .setFont(font)
1297 ;
1298 cp5.addButton("X5") // "aloff" is the name of button
1299     .setPosition(190, 450) // x and y coordinates of upper left corner of button
1300     .setSize(25, 25) // (width, height)
1301     .setFont(font)
1302 ;
1303 cp5.addButton("Y5") // "aloff" is the name of button
```

```
1304     .setPosition(190, 500) //x and y coordinates of upper left corner of button
1305     .setSize(25, 25)    //(width, height)
1306     .setFont(font)
1307 ;
1308 cp5.addButton("X6")    //"aloff" is the name of button
1309     .setPosition(225, 450) //x and y coordinates of upper left corner of button
1310     .setSize(25, 25)    //(width, height)
1311     .setFont(font)
1312 ;
1313 cp5.addButton("Y6")    //"aloff" is the name of button
1314     .setPosition(225, 500) //x and y coordinates of upper left corner of button
1315     .setSize(25, 25)    //(width, height)
1316     .setFont(font)
1317 ;
1318 cp5.addButton("X7")    //"aloff" is the name of button
1319     .setPosition(260, 450) //x and y coordinates of upper left corner of button
1320     .setSize(25, 25)    //(width, height)
1321     .setFont(font)
1322 ;
1323 cp5.addButton("Y7")    //"aloff" is the name of button
1324     .setPosition(260, 500) //x and y coordinates of upper left corner of button
1325     .setSize(25, 25)    //(width, height)
1326     .setFont(font)
1327 ;
1328 cp5.addButton("X8")    //"aloff" is the name of button
1329     .setPosition(295, 450) //x and y coordinates of upper left corner of button
1330     .setSize(25, 25)    //(width, height)
1331     .setFont(font)
1332 ;
1333 cp5.addButton("Y8")    //"aloff" is the name of button
1334     .setPosition(295, 500) //x and y coordinates of upper left corner of button
1335     .setSize(25, 25)    //(width, height)
1336     .setFont(font)
1337 ;
1338 cp5.addButton("X9")    //"aloff" is the name of button
1339     .setPosition(330, 450) //x and y coordinates of upper left corner of button
1340     .setSize(25, 25)    //(width, height)
1341     .setFont(font)
1342 ;
1343 cp5.addButton("Y9")    //"aloff" is the name of button
1344     .setPosition(330, 500) //x and y coordinates of upper left corner of button
1345     .setSize(25, 25)    //(width, height)
1346     .setFont(font)
1347 ;
1348 cp5.addButton("X10")   //"aloff" is the name of button
1349     .setPosition(365, 450) //x and y coordinates of upper left corner of button
1350     .setSize(40, 25)    //(width, height)
1351     .setFont(font)
1352 ;
1353 cp5.addButton("Y10")   //"aloff" is the name of button
1354     .setPosition(365, 500) //x and y coordinates of upper left corner of button
```

```

1355     .setSize(40, 25)    //(width, height)
1356     .setFont(font)
1357 ;
1358 cp5.addButton("X11")    //"alloff" is the name of button
1359     .setPosition(415, 450) //x and y coordinates of upper left corner of button
1360     .setSize(40, 25)    //(width, height)
1361     .setFont(font)
1362 ;
1363 cp5.addButton("Y11")    //"alloff" is the name of button
1364     .setPosition(415, 500) //x and y coordinates of upper left corner of button
1365     .setSize(40, 25)    //(width, height)
1366     .setFont(font)
1367 ;
1368 cp5.addButton("X12")    //"alloff" is the name of button
1369     .setPosition(465, 450) //x and y coordinates of upper left corner of button
1370     .setSize(40, 25)    //(width, height)
1371     .setFont(font)
1372 ;
1373 cp5.addButton("Y12")    //"alloff" is the name of button
1374     .setPosition(465, 500) //x and y coordinates of upper left corner of button
1375     .setSize(40, 25)    //(width, height)
1376     .setFont(font)
1377 ;
1378 }
1379 void draw(){ //same as loop in arduino
1380     background(150, 0 , 150); // background color of window (r, g, b) or (0 to 255)
1381
1382     //lets give title to our window
1383     fill(0, 255, 0);          //text color (r, g, b)
1384     textFont(font);
1385     text("VALVE CONTROL", 50, 30); // ("text", x coordinate, y coordinat)
1386 }
1387 void CtoW(){
1388     port.write('a');
1389 }
1390 void BtoW(){
1391     port.write('b');
1392 }
1393 void AtoW(){
1394     port.write('c');
1395 }
1396 void Ato78(){
1397     port.write('d');
1398 }
1399 void Ato1112(){
1400     port.write('e');
1401 }
1402 void AtoAll(){
1403     port.write('f');
1404 }
1405 void BtoAll(){

```

```
1406     port.write('g');
1407 }
1408 void CtoAll(){
1409     port.write('h');
1410 }
1411 void AtoF4(){
1412     port.write('i');
1413 }
1414 void BtoF4(){
1415     port.write('j');
1416 }
1417 void CtoF4(){
1418     port.write('k');
1419 }
1420 void AtoL4(){
1421     port.write('l');
1422 }
1423 void BtoL4(){
1424     port.write('m');
1425 }
1426 void CtoL4(){
1427     port.write('n');
1428 }
1429 void AllOn(){
1430     port.write('o');
1431 }
1432 void DtoW(){
1433     port.write('p');
1434 }
1435 void DtoA(){
1436     port.write('q');
1437 }
1438 void DtoF4(){
1439     port.write('r');
1440 }
1441 void DtoL4(){
1442     port.write('s');
1443 }
1444 void X1(){
1445     port.write('A');
1446 }
1447 void X2(){
1448     port.write('B');
1449 }
1450 void X3(){
1451     port.write('C');
1452 }
1453 void X4(){
1454     port.write('D');
1455 }
1456 void X5(){
```

```
1457     port.write('E');
1458 }
1459 void X6(){
1460     port.write('F');
1461 }
1462 void X7(){
1463     port.write('G');
1464 }
1465 void X8(){
1466     port.write('H');
1467 }
1468 void X9(){
1469     port.write('I');
1470 }
1471 void X10(){
1472     port.write('J');
1473 }
1474 void X11(){
1475     port.write('K');
1476 }
1477 void X12(){
1478     port.write('L');
1479 }
1480 void Y1(){
1481     port.write('M');
1482 }
1483 void Y2(){
1484     port.write('N');
1485 }
1486 void Y3(){
1487     port.write('O');
1488 }
1489 void Y4(){
1490     port.write('P');
1491 }
1492 void Y5(){
1493     port.write('Q');
1494 }
1495 void Y6(){
1496     port.write('R');
1497 }
1498 void Y7(){
1499     port.write('S');
1500 }
1501 void Y8(){
1502     port.write('T');
1503 }
1504 void Y9(){
1505     port.write('U');
1506 }
1507 void Y10(){
```

```

1508     port.write('V');
1509 }
1510 void Y11(){
1511     port.write('W');
1512 }
1513 void Y12(){
1514     port.write('X');
1515 }
1516

```

### 1517 **Extended Data Script 2.**

```

1518 int incomingByte = 0;
1519 int p1 = 1;int p2 = 2;int p3 = 3;int p4 = 4;int p5 = 5;int p6 = 6;int p7 = 7;int p8 = 8;int p9 = 9;int p10 =
1520 10;int p11 = 11;int p12 = 12;int p13 = 13;int p14 = 14;int p15 = 15;int p16 = 16;int p17 = 17;int p18 =
1521 18;int p19 = 19;int p20 = 20;int p21 = 21;int p22 = 22;int p23 = 23;int p24 = 24;
1522
1523 void setallvalves(int v1, int v2, int v3, int v4, int v5, int v6, int v7, int v8, int v9, int v10, int v11, int v12,
1524 int v13, int v14, int v15, int v16, int v17, int v18, int v19, int v20, int v21, int v22, int v23, int v24){
1525     if (v1 == 1){digitalWrite(p1, HIGH);}
1526     else {digitalWrite(p1, LOW);}
1527     if (v2 == 1){digitalWrite(p2, HIGH);}
1528     else {digitalWrite(p2, LOW);}
1529     if (v3 == 1){digitalWrite(p3, HIGH);}
1530     else{digitalWrite(p3, LOW);}
1531     if (v4 == 1){digitalWrite(p4, HIGH);}
1532     else{digitalWrite(p4, LOW);}
1533     if (v5 == 1){digitalWrite(p5, HIGH);}
1534     else{digitalWrite(p5, LOW);}
1535     if (v6 == 1){digitalWrite(p6, HIGH);}
1536     else{digitalWrite(p6, LOW);}
1537     if (v7 == 1){digitalWrite(p7, HIGH);}
1538     else{digitalWrite(p7, LOW);}
1539     if (v8 == 1){digitalWrite(p8, HIGH);}
1540     else{digitalWrite(p8, LOW);}
1541     if (v9 == 1){digitalWrite(p9, HIGH);}
1542     else{digitalWrite(p9, LOW);}
1543     if (v10 == 1){digitalWrite(p10, HIGH);}
1544     else{digitalWrite(p10, LOW);}
1545     if (v11 == 1){digitalWrite(p11, HIGH);}
1546     else{digitalWrite(p11, LOW);}
1547     if (v12 == 1){digitalWrite(p12, HIGH);}
1548     else{digitalWrite(p12, LOW);}
1549     if (v13 == 1){digitalWrite(p13, HIGH);}
1550     else{digitalWrite(p13, LOW);}
1551     if (v14 == 1){digitalWrite(p14, HIGH);}
1552     else{digitalWrite(p14, LOW);}
1553     if (v15 == 1){digitalWrite(p15, HIGH);}
1554     else{digitalWrite(p15, LOW);}
1555     if (v16 == 1){digitalWrite(p16, HIGH);}
1556     else{digitalWrite(p16, LOW);}
1557     if (v17 == 1){digitalWrite(p17, HIGH);}
1558     else{digitalWrite(p17, LOW);}

```



```

1559   if (v18 == 1){digitalWrite(p18, HIGH);}
1560   else{digitalWrite(p18, LOW);}
1561   if (v19 == 1){digitalWrite(p19, HIGH);}
1562   else{digitalWrite(p19, LOW);}
1563   if (v20 == 1){digitalWrite(p20, HIGH);}
1564   else{digitalWrite(p20, LOW);}
1565   if (v21 == 1){digitalWrite(p21, HIGH);}
1566   else{digitalWrite(p21, LOW);}
1567   if (v22 == 1){digitalWrite(p22, HIGH);}
1568   else{digitalWrite(p22, LOW);}
1569   if (v23 == 1){digitalWrite(p23, HIGH);}
1570   else{digitalWrite(p23, LOW);}
1571   if (v24 == 1){digitalWrite(p24, HIGH);}
1572   else{digitalWrite(p24, LOW);}
1573 }
1574
1575 void setup() {
1576   Serial.begin(9600);
1577   pinMode(p1, OUTPUT);pinMode(p2, OUTPUT);pinMode(p3, OUTPUT);pinMode(p4,
1578   OUTPUT);pinMode(p5, OUTPUT);pinMode(p6, OUTPUT); pinMode(p7, OUTPUT); pinMode(p8,
1579   OUTPUT); pinMode(p9, OUTPUT); pinMode(p10, OUTPUT); pinMode(p11, OUTPUT);
1580   pinMode(p12, OUTPUT); pinMode(p13, OUTPUT); pinMode(p14, OUTPUT); pinMode(p15,
1581   OUTPUT); pinMode(p16, OUTPUT); pinMode(p17, OUTPUT); pinMode(p18, OUTPUT);
1582   pinMode(p19, OUTPUT); pinMode(p20, OUTPUT); pinMode(p21, OUTPUT); pinMode(p22,
1583   OUTPUT);pinMode(p23, OUTPUT);pinMode(p24, OUTPUT);
1584   delay(1000);
1585   digitalWrite(p1, LOW); digitalWrite(p2, LOW); digitalWrite(p3, LOW); digitalWrite(p4, LOW);
1586   digitalWrite(p5, LOW);digitalWrite(p6, LOW); digitalWrite(p7, LOW); digitalWrite(p8, LOW);
1587   digitalWrite(p9, LOW); digitalWrite(p10, LOW); digitalWrite(p11, LOW); digitalWrite(p12, LOW);
1588   digitalWrite(p13, LOW); digitalWrite(p14, LOW); digitalWrite(p15, LOW); digitalWrite(p16, LOW);
1589   digitalWrite(p17, LOW); digitalWrite(p18, LOW); digitalWrite(p19, LOW); digitalWrite(p20, LOW);
1590   digitalWrite(p21, LOW); digitalWrite(p22, LOW); digitalWrite(p23, LOW); digitalWrite(p24, LOW);
1591 }
1592
1593 void loop() {
1594   // if we get a valid byte, read analog ins:
1595   if (Serial.available() > 0) {
1596     // get incoming byte:
1597     char val = Serial.read();
1598     if(val == 'a'){ //C -> Waste
1599       setallvalves(1,0,0,1,0,0,1,1,1,1,1,0,0,0,0,0,0,0,0,0,0,0);
1600     }
1601     if(val == 'b'){ //B -> Waste
1602       setallvalves(0,1,1,0,0,0,1,1,1,1,1,0,0,0,0,0,0,0,0,0,0,0);
1603     }
1604     if(val == 'c'){ //A -> Waste
1605       setallvalves(1,0,1,0,0,0,1,1,1,1,1,0,0,0,0,0,0,0,0,0,0,0);
1606     }
1607     if(val == 'd'){ //A -> 7,8
1608       setallvalves(1,0,1,0,1,0,1,1,1,1,1,0,0,0,0,0,0,0,0,0,0,0);
1609     }

```

```

1610 if(val == 'e'){ //A -> 11,12
1611     setallvalves(1,0,1,0,1,0,0,0,0,0,1,1,0,0,0,0,0,0,0,0,0,0);
1612 }
1613 if(val == 'f'){ //A -> All
1614     setallvalves(1,0,1,0,1,0,0,0,0,0,0,0,0,0,0,0,0,0,0,0,0,0);
1615 }
1616 if(val == 'g'){ //B -> All
1617     setallvalves(0,1,1,0,1,0,0,0,0,0,0,0,0,0,0,0,0,0,0,0,0,0);
1618 }
1619 if(val == 'h'){ //C -> All
1620     setallvalves(1,0,0,1,1,0,0,0,0,0,0,0,0,0,0,0,0,0,0,0,0,0);
1621 }
1622 if(val == 'i'){ //A -> First 4
1623     setallvalves(1,0,1,0,1,0,0,1,0,0,0,0,0,0,0,0,0,0,0,0,0,0);
1624 }
1625 if(val == 'j'){ //B -> First 4
1626     setallvalves(0,1,1,0,1,0,0,1,0,0,0,0,0,0,0,0,0,0,0,0,0,0);
1627 }
1628 if(val == 'k'){ //C -> First 4
1629     setallvalves(1,0,0,1,1,0,0,1,0,0,0,0,0,0,0,0,0,0,0,0,0,0);
1630 }
1631 if(val == 'l'){ //A -> Last 4
1632     setallvalves(1,0,1,0,1,0,1,0,0,0,0,0,0,0,0,0,0,0,0,0,0,0);
1633 }
1634 if(val == 'm'){ //B -> Last 4
1635     setallvalves(0,1,1,0,1,0,1,0,0,0,0,0,0,0,0,0,0,0,0,0,0,0);
1636 }
1637 if(val == 'n'){ //C -> Last 4
1638     setallvalves(1,0,0,1,1,0,1,0,0,0,0,0,0,0,0,0,0,0,0,0,0,0);
1639 }
1640 if(val == 'o'){ //All On
1641     setallvalves(1,1,1,1,1,1,1,1,1,1,0,0,0,0,0,0,0,0,0,0,0,0);
1642 }
1643
1644 if(val == 'p'){ //D to Waste
1645     setallvalves(0,1,0,1,0,0,1,1,1,1,1,0,0,0,0,0,0,0,0,0,0,0);
1646 }
1647 if(val == 'q'){ //D to All
1648     setallvalves(0,1,0,1,1,0,0,0,0,0,0,0,0,0,0,0,0,0,0,0,0,0);
1649 }
1650 if(val == 'r'){ //D to Former 4
1651     setallvalves(0,1,0,1,1,0,0,1,0,0,0,0,0,0,0,0,0,0,0,0,0,0);
1652 }
1653 if(val == 's'){ //D to Later 4
1654     setallvalves(0,1,0,1,1,0,1,0,0,0,0,0,0,0,0,0,0,0,0,0,0,0);
1655 }
1656
1657 if(val == 'A'){ //V1 On
1658     digitalWrite(p1, HIGH);
1659 }
1660 if(val == 'B'){ //V2 On

```

```
1661     digitalWrite(p2, HIGH);
1662     }
1663     if(val == 'C'){    //V3 On
1664     digitalWrite(p3, HIGH);
1665     }
1666     if(val == 'D'){    //V4 On
1667     digitalWrite(p4, HIGH);
1668     }
1669     if(val == 'E'){    //V5 On
1670     digitalWrite(p5, HIGH);
1671     }
1672     if(val == 'F'){    //V6 On
1673     digitalWrite(p6, HIGH);
1674     }
1675     if(val == 'G'){    //V7 On
1676     digitalWrite(p7, HIGH);
1677     }
1678     if(val == 'H'){    //V8 On
1679     digitalWrite(p8, HIGH);
1680     }
1681     if(val == 'I'){    //V9 On
1682     digitalWrite(p9, HIGH);
1683     }
1684     if(val == 'J'){    //V10 On
1685     digitalWrite(p10, HIGH);
1686     }
1687     if(val == 'K'){    //V11 On
1688     digitalWrite(p11, HIGH);
1689     }
1690     if(val == 'L'){    //V12 On
1691     digitalWrite(p12, HIGH);
1692     }
1693     if(val == 'M'){    //V1 Off
1694     digitalWrite(p1, LOW);
1695     }
1696     if(val == 'N'){    //V2 Off
1697     digitalWrite(p2, LOW);
1698     }
1699     if(val == 'O'){    //V3 Off
1700     digitalWrite(p3, LOW);
1701     }
1702     if(val == 'P'){    //V4 Off
1703     digitalWrite(p4, LOW);
1704     }
1705     if(val == 'Q'){    //V5 Off
1706     digitalWrite(p5, LOW);
1707     }
1708     if(val == 'R'){    //V6 Off
1709     digitalWrite(p6, LOW);
1710     }
1711     if(val == 'S'){    //V7 Off
```

```
1712     digitalWrite(p7, LOW);
1713     }
1714     if(val == 'T'){ //V8 Off
1715         digitalWrite(p8, LOW);
1716     }
1717     if(val == 'U'){ //V9 Off
1718         digitalWrite(p9, LOW);
1719     }
1720     if(val == 'V'){ //V10 Off
1721         digitalWrite(p10, LOW);
1722     }
1723     if(val == 'W'){ //V11 Off
1724         digitalWrite(p11, LOW);
1725     }
1726     if(val == 'X'){ //V12 Off
1727         digitalWrite(p12, LOW);
1728     }
1729 }
1730 }
```
