# Supplementary material
Source: PubMed Central journal article supplement (PMC7612300)
Supplement: EMS140927-supplement-Extended_Data_Table_1.pdf [file EMS140927-supplement-Extended_Data_Table_1.pdf]

**Extended Data Table 1. Phospho-proteomic data of rapid auxin effects in root and phospho-proteomic analysis of H<sup>+</sup>-ATPases in *tmk1-1* mutants**

Table contains differentially regulated phospho-peptides (FDR ≤0.05) in H<sup>+</sup>-ATPases in IAA treated versus mock-treated roots. IAA treatment was at 100 nM for 2 minutes. QHF and LTQXL analysis are given in Tab 1 and 2, respectively. Tab 3 shows the differentially phosphorylated phospho-sites of AHAs in *tmk1-1* background compared to WT.

**Tab1. QHF analysis**

| FDR   | LOG2(IAA/mock) | Positions in prote | Gene names    | Sequence window                                            | Phospho (STY) Probabilities |
|-------|----------------|--------------------|---------------|------------------------------------------------------------|-----------------------------|
| 1.455 | 3.700          |                    | 2 AHA1        | _____MSGLEDIKNETVDLEKI                                     | S(1)GLEDIKNETVDLEK          |
| 1.397 | -0.564         | 881;817            | AHA1          | YGIGEREAWAQAQRTLHGLQPKEDVNIFPE                             | T(1)LHGLQPK                 |
| 2.030 | 0.833          | 899;835            | AHA1          | GLQPKEDVNIFPEKGSYRELSEIAEQAKRRA                            | EDVNIFPEKGS(1)YR            |
| 1.397 | -0.564         | 881;914            | AHA2;HA2      | YGKEEREAWALAQRTHLGLQPKAVNIFPE                              | T(1)LHGLQPK                 |
| 2.403 | 0.753          | 899;932            | AHA2;HA2      | GLQPKAVNIFPEKGSYRELSEIAEQAKRRA                             | EAVNIFPEKGS(1)YR            |
| 2.371 | 0.632          | 942;975            | AHA2;HA2      | GHVESVVKLGDIETPSHYTV_____                                  | GLDIET(0.999)PS(0.001)HYTV  |
| 1.403 | -0.936         | 881;914;881;817    | AHA2;HA2;AHA1 | YGIGEREAWAQAQRTLHGLQPKEDVNIFPE;YGKEEREAWALAQRTHLGLQPKAVNIF | T(1)LHGLQPK                 |

**Tab2. LTQXL analysis**

| FDR   | LOG2(IAA/mock) | Positions within proteins                       | Gene names                            | Sequence window                                             |
|-------|----------------|-------------------------------------------------|---------------------------------------|-------------------------------------------------------------|
| 4.482 | 1.823          | 881;914                                         | AHA2;HA2                              | YGKEEREAWALAQRTHLGLQPKAVNIFPE                               |
| 2.044 | 1.314          | 947;980                                         | AHA2;HA2                              | VVKLGDIETPSHYTV_____                                        |
| 1.603 | 0.593          | 931;964;931;670;930;807;913;976;931;936;670;932 | AHA2;HA2;AHA6;AHA8;HA9;AHA5;AHA9;AHA3 | IARLRELHTLKGHVESVVKLGDIETAGHY;IARLRELHTLKGHVESVVKLGDIETPSHY |

**Tab3. WT vs *tmk1-1***

| Pos | FDR   | LOG2( <i>t</i> <sub><i>mk1-1</i></sub> / <i>WT</i> ) | hyper/hypo in <i>tmk1-1</i> | Known function | Gene names      | Sequence window                 | Phospho (STY) Probabilities |
|-----|-------|------------------------------------------------------|-----------------------------|----------------|-----------------|---------------------------------|-----------------------------|
| 881 | 2.800 | -0.693                                               | hypo                        | activation     | AHA1 or AHA2;HA | YGIGEREAWAQAQRTLHGLQPKEDVNIFPE  | T(1)LHGLQPK                 |
| 882 | 3.120 | -1.478                                               | hypo                        | activation     | AHA3            | YGIEEREAWAHAQRTLHGLQNTETANVVP   | T(1)LHGLQNTETANVPPER        |
| 948 | 3.034 | -0.621                                               | hypo                        | activation     | AHA1            | AKLKGLDIDTAGHHYTV_____          | GLDIDTAGHHYT(1)V            |
| 947 | 3.646 | -1.025                                               | hypo                        | activation     | AHA2;HA2        | VVKLGDIETPSHYTV_____            | LKGLDIETPSHYT(1)V           |
| 948 | 2.653 | -1.783                                               | hypo                        | activation     | AHA3            | VVKLGDIETAGHYTV_____            | GLDIETAGHYT(1)V             |
| 899 | 2.913 | -0.576                                               | hypo                        | inhibitory     | AHA1            | GLQPKEDVNIFPEKGSYRELSEIAEQAKRRA | EDVNIFPEKGS(1)YR            |
| 899 | 2.004 | -0.461                                               | hypo                        | inhibitory     | AHA2;HA2        | GLQPKAVNIFPEKGSYRELSEIAEQAKRRA  | EAVNIFPEKGS(1)YR            |
| 931 | 3.546 | 1.813                                                | hyper                       | inhibitory     | AHA1            | IARLRELHTLKGHVESVAKLGLDIDTAGHH  | GHVES(1)VAK                 |
| 942 | 3.922 | -0.385                                               | hypo                        | n/a            | AHA2;HA2        | GHVESVVKLGDIETPSHYTV_____       | GLDIET(0.998)PS(0.002)HYTV  |
| 955 | 6.383 | -3.999                                               | hypo                        | n/a            | AHA11;AHA4      | VRLKGLDIETIQAYTV_____           | GLDIETIQAYT(1)V             |
