# Supplementary material
Source: PubMed Central journal article supplement (PMC7612300)
Supplement: EMS140927-supplement-Extended_Data_Table_2.pdf [file EMS140927-supplement-Extended_Data_Table_2.pdf]

## Extended Data Table 2. IP-MS analysis of *pTIR1::TIR1-VENUS* and *pAFB1::AFB1-VENUS*

Overview of the putative TIR1 and AFB1 interactors after MaxQuant and Perseus statistical analysis. Samples were TIR1 and AFB1-Venus lines under mock, 50  $\mu$ M MG132 pre-incubation for 1 hour and 100 nM IAA treatment for 2 minutes. Proteins passing the threshold of FDR 0.05 and specific fold change are included in the table. P-values are calculated based on the three replicates using a Two-sided t-test. Pulldowns were performed in triplicate. Yellow highlight indicates the respective bait protein.

**Tab1. TIR1 with Mock**

| LOG2(TIR1/Contro | X-LOG10FDI | Peptides | Student's T-te | Majority protein IDs      | Protein names                                                                                                        |
|------------------|------------|----------|----------------|---------------------------|----------------------------------------------------------------------------------------------------------------------|
| 5.118258158      | 3.27648164 | 17       | 10.15708944    | Q39255                    | SKP1-like protein 1A                                                                                                 |
| 4.754890442      | 2.34634325 | 10       | 5.760780734    | Q570C0                    | Protein TRANSPORT INHIBITOR RESPONSE 1                                                                               |
| 3.60787646       | 2.94711492 | 2        | 8.340412262    | P38666;Q42347             | 60S ribosomal protein L24-2;60S ribosomal protein L24-1                                                              |
| 2.98809878       | 1.73797235 | 2        | 3.851309445    | P16180                    | 30S ribosomal protein S17, chloroplastic                                                                             |
| 2.459372203      | 0.85221949 | 2        | 1.834243789    | Q94AH6                    | Cullin-1                                                                                                             |
| 2.273972829      | 2.46638828 | 2        | 6.212296758    | F4JZ17;Q39129             | Thiosulfate sulfurtransferase 16, chloroplastic                                                                      |
| 2.201576869      | 0.96994873 | 2        | 2.070539977    | Q42431                    | Oleosin 20.3 kDa                                                                                                     |
| 2.001925786      | 0.87062371 | 4        | 1.870823782    | F4JVC0;F4JVC1;Q03251;F4JV | Glycine-rich RNA-binding protein 8                                                                                   |
| 1.988611857      | 1.64404399 | 15       | 3.603054736    | Q9FHW7                    | SKP1-like protein 1B                                                                                                 |
| 1.940104802      | 1.79712208 | 3        | 4.013188676    | Q9MAH3                    | Protein DJ-1 homolog B                                                                                               |
| 1.933815002      | 0.86164735 | 2        | 1.852967808    | P59230;Q8VZB9;P59231      | 60S ribosomal protein L10a-2;60S ribosomal protein L10a-1;60S ribosomal protein L10a-3                               |
| 1.823474248      | 1.06487476 | 2        | 2.2658229      | Q8LA13;Q84W89;Q9M2F9      | DEAD-box ATP-dependent RNA helicase 11;DEAD-box ATP-dependent RNA helicase 37;DEAD-box ATP-dependent RNA helicase 52 |
| 1.708749771      | 0.93651248 | 3        | 2.002836801    | P16127;Q5XF33             | Magnesium-chelatase subunit Chl1-1, chloroplastic;Magnesium-chelatase subunit Chl1-2, chloroplastic                  |
| 1.60286204       | 1.15507001 | 2        | 2.456251697    | Q9LU14                    | GDSL esterase/lipase APG                                                                                             |

**Tab2. TIR1 with MG132+IAA**

| LOG2(TIR1/Contro | X-LOG10FDI | Peptides | Majority protein IDs              | Protein names                                                                                                                                   |
|------------------|------------|----------|-----------------------------------|-------------------------------------------------------------------------------------------------------------------------------------------------|
| 4.927825928      | 3.49271141 | 8        | Q570C0                            | Protein TRANSPORT INHIBITOR RESPONSE 1                                                                                                          |
| 3.933736801      | 2.80313389 | 2        | A8MS83;Q9M3C3;Q8LD46              | 60S ribosomal protein L23a-2;60S ribosomal protein L23a-1                                                                                       |
| 3.685892105      | 4.80039226 | 4        | Q9LY66;F4J296                     | 50S ribosomal protein L1, chloroplastic;Ribosomal protein                                                                                       |
| 3.657317479      | 3.40802567 | 2        | Q94F20;Q9LYE7                     |                                                                                                                                                 |
| 3.300284704      | 1.30913348 | 9        | Q9S841                            | Oxygen-evolving enhancer protein 1-2, chloroplastic                                                                                             |
| 3.252434413      | 3.01858947 | 1        | Q9FZH0;P51422;Q9LMK0;Q9C912       | 60S ribosomal protein L35a-2;60S ribosomal protein L35a-4;60S ribosomal protein L35a-1;60S ribosomal protein L35a-3                             |
| 3.030831655      | 1.22114312 | 7        | F4K5C7;Q93VH9;Q8VYK6;P49204;F4IMI | 40S ribosomal protein S4;40S ribosomal protein S4-1;40S ribosomal protein S4-3;40S ribosomal protein S4-2                                       |
| 2.978437424      | 2.67620031 | 4        | Q94AH6                            | Cullin-1                                                                                                                                        |
| 2.882202148      | 0.94348696 | 5        | O65282                            | 20 kDa chaperonin, chloroplastic                                                                                                                |
| 2.844031016      | 1.06575137 | 8        | O50008;Q9SRV5                     | 5-methyltetrahydropteroyltryglutamate--homocysteine methyltransferase 1;5-methyltetrahydropteroyltryglutamate--homocysteine methyltransferase 2 |
| 2.810997645      | 1.77625477 | 2        | Q9LZH9;P49692                     | 60S ribosomal protein L7a-2;60S ribosomal protein L7a-1                                                                                         |
| 2.78762118       | 0.85362368 | 3        | P56779                            | Cytochrome b559 subunit alpha                                                                                                                   |
| 2.732335409      | 0.99431437 | 4        | P56761                            | Photosystem II D2 protein                                                                                                                       |
| 2.729720434      | 1.80469265 | 1        | P56780                            | Photosystem II reaction center protein H                                                                                                        |
| 2.696318944      | 1.16176096 | 15       | Q39255                            | SKP1-like protein 1A                                                                                                                            |
| 2.654738108      | 3.21512215 | 3        | Q9SRZ6                            | Cytosolic isocitrate dehydrogenase [NADP]                                                                                                       |
| 2.62142245       | 0.88366927 | 14       | P56777                            | Photosystem II CP47 reaction center protein                                                                                                     |
| 2.577622732      | 1.27224002 | 4        | P49200;Q9STY6                     | 40S ribosomal protein S20-1;40S ribosomal protein S20-2                                                                                         |
| 2.557145437      | 2.92182336 | 2        | P56767                            | Photosystem I P700 chlorophyll a apoprotein A2                                                                                                  |
| 2.468788783      | 1.02031666 | 2        | P59224;P59223                     | 40S ribosomal protein S13-2;40S ribosomal protein S13-1                                                                                         |

**Tab3. AFB1 with Mock**

| LOG2(AFB1/ConctrX-LOG10FDR) | Peptides    | Majority protein IDs | Protein names                                                                                                 |
|-----------------------------|-------------|----------------------|---------------------------------------------------------------------------------------------------------------|
| 12.71776517                 | 3.186698841 | 39 Q9ZR12            | GRR1-like protein 1                                                                                           |
| 12.1318264                  | 5.01302371  | 17 Q39255            | SKP1-like protein 1A                                                                                          |
| 8.830174764                 | 3.734570639 | 15 Q9FHW7            | SKP1-like protein 1B                                                                                          |
| 5.277590434                 | 3.678132585 | 4 Q9LNT9             | SKP1-like protein 4                                                                                           |
| 3.481123606                 | 3.122493649 | 2 F4JZ17;Q39129      | Thiosulfate sulfurtransferase 16, chloroplastic                                                               |
| 3.299066544                 | 2.864853421 | 2 P38666;Q42347      | 60S ribosomal protein L24-2;60S ribosomal protein L24-1                                                       |
| 3.181758245                 | 2.478213172 | 4 Q8RWZ3             | Probable acyl-CoA dehydrogenase IBR3                                                                          |
| 2.674465815                 | 0.602639535 | 9 Q96318;F4JLA9;A0A1 | 12S seed storage protein CRC;12S seed storage protein CRC alpha chain;12S seed storage protein CRC beta chain |
| 2.493788401                 | 1.366144629 | 4 A0A1I9LR27;F4JBC9; | Peroxioredoxin Q, chloroplastic                                                                               |
| 2.472199122                 | 1.72041483  | 2 Q9LIK9;A0A1P8B819; | ATP sulfurylase 1, chloroplastic;ATP-sulfurylase 3, chloroplastic;ATP sulfurylase 2                           |
| 2.393953959                 | 1.62946189  | 2 F4J3P1;P49690      | 60S ribosomal protein L23                                                                                     |
| 2.321870804                 | 0.796044035 | 4 F4JVC0;F4JVC1;Q03; | Glycine-rich RNA-binding protein 8                                                                            |
| 2.203902562                 | 2.8275101   | 3 P54150             | Peptide methionine sulfoxide reductase A4, chloroplastic                                                      |
| 2.177773158                 | 0.688776393 | 2 Q9XEX2;F4ID64      | Peroxioredoxin-2B                                                                                             |
| 2.140075048                 | 1.556645965 | 3 Q9MAH3             | Protein DJ-1 homolog B                                                                                        |
| 2.124917984                 | 2.740719054 | 8 Q9PFF0             | Protein DJ-1 homolog A                                                                                        |
| 1.950544993                 | 2.509962048 | 8 Q42403             | Thioredoxin H3                                                                                                |
| 1.90527916                  | 1.200714146 | 10 Q570C0            | Protein TRANSPORT INHIBITOR RESPONSE 1                                                                        |
| 1.868207932                 | 2.585869519 | 4 F4JRT7;Q9SW21      | Acyl carrier protein;Acyl carrier protein 4, chloroplastic                                                    |
| 1.83743159                  | 2.210789882 | 4 Q9LMU2             |                                                                                                               |

**Tab4. AFB1 with MG132+IAA**

| LOG2(AFB1/ConctrX-LOG10FDR) | Unique peptide | Majority protein IDs | Protein names                                                     |
|-----------------------------|----------------|----------------------|-------------------------------------------------------------------|
| 12.90374565                 | 3.74151941     | 40 Q9ZR12            | GRR1-like protein 1                                               |
| 10.63748741                 | 3.38102284     | 10 Q39255            | SKP1-like protein 1A                                              |
| 6.259954453                 | 3.92243778     | 7 Q9FHW7             | SKP1-like protein 1B                                              |
| 4.639073054                 | 4.3296288      | 10 Q8RWZ3            | Probable acyl-CoA dehydrogenase IBR3                              |
| 4.359214783                 | 2.19487358     | 4 A0A1P8B1L4;Q9ZVJ   | Annexin D4                                                        |
| 3.768214544                 | 2.99147254     | 3 F4K884;P54904      | Pyrroline-5-carboxylate reductase                                 |
| 1.720092138                 | 0.82292309     | 2 Q9LFH5;P50883;Q9F  | 60S ribosomal protein L12-2;60S ribosomal protein L12-1;60S rib   |
| 1.644043605                 | 0.73016299     | 2 Q9T043;Q9SIM4      | 60S ribosomal protein L14-2;60S ribosomal protein L14-1           |
| 1.637237549                 | 0.71121767     | 8 O50008;Q9SRV5      | 5-methyltetrahydropteroyltryglutamate--homocysteine methyltransfe |
| 1.612161636                 | 1.66766713     | 3 P22953;F4KCE5      | Probable mediator of RNA polymerase II transcription subunit 37e  |
| 1.431067149                 | 1.70145982     | 6 P59259;A8MRV1      | Histone H4                                                        |
| 1.361975988                 | 0.88519951     | 4 P49200;Q9STY6      | 40S ribosomal protein S20-1;40S ribosomal protein S20-2           |
| 1.265961965                 | 1.72620153     | 3 Q56WH1;B9DHQ0      | Tubulin alpha-3 chain;Tubulin alpha-5 chain                       |
| 1.181111018                 | 0.8679059      | 4 Q06588             | 1-aminocyclopropane-1-carboxylate oxidase 4                       |
| 1.174767812                 | 1.24492756     | 3 O04314             | PYK10-binding protein 1                                           |
| 0.979935964                 | 0.54012105     | 2 P42795;P42794      | 60S ribosomal protein L11-1;60S ribosomal protein L11-2           |
| 0.946492513                 | 0.61817655     | 2 P59224;P59223      | 40S ribosomal protein S13-2;40S ribosomal protein S13-1           |
| 0.933000565                 | 1.33895745     | 2 O23049             | 50S ribosomal protein L6, chloroplastic                           |
| 0.860973358                 | 0.25342145     | 1 Q9LTX9             | Heat shock 70 kDa protein 7, chloroplastic                        |
| 0.841140111                 | 0.42174345     | 3 Q9SCX3             | Elongation factor 1-beta 2                                        |
