# Supplementary material
Source: PubMed Central journal article supplement (PMC7612300)
Supplement: EMS140927-supplement-Extended_Data_Table_3.pdf [file EMS140927-supplement-Extended_Data_Table_3.pdf]

### Extended Data Table 3. IP-MS analysis of *p35S::TMKI-GFP*.

Overview of the putative TMK1 interactors after MaxQuant and Perseus statistical analysis. The list is sorted based on the ratio of *35S::TMKI-GFP* vs WT control. Proteins passing the threshold of FDR 0.05 and specific fold change are included in the table. P-values are calculated based on the three replicates using a two-sided t-test. Yellow highlight indicates bait, green indicates GFP and orange indicates selected proteins.

| Average V | Average TM | Ratio  | P-value  | Fasta.headers                                                                          |
|-----------|------------|--------|----------|----------------------------------------------------------------------------------------|
| 4.68      | 7.67       | 963.19 | 9.27E-05 | Symbols: TMK1   transmembrane kinase 1   chr1:24631503-24634415 FORWARD LENG           |
| 5.59      | 6.98       | 24.32  | 2.77E-01 | Symbols:   Protein prenyltransferase superfamily protein   chr5:5679995-5685597 FORW   |
| 4.51      | 5.85       | 21.80  | 3.99E-03 | Symbols: PGP10   P-glycoprotein 10   chr1:3538470-3543782 REVERSE LENGTH=1227          |
| 4.64      | 5.81       | 14.75  | 3.25E-02 | Symbols: PIP2F, PIP2;4   plasma membrane intrinsic protein 2;4   chr5:24375673-2437693 |
| 6.01      | 7.11       | 12.53  | 3.11E-05 | Symbols: AHA1, PMA, OST2, HA1   H(+)-ATPase 1   chr2:8221858-8227268 FORWARD           |
| 5.06      | 6.10       | 10.99  | 1.34E-01 | ALDOA_RABIT   Fructose-bisphosphate aldolase A (EC 4.1.2.13) (Muscle-type aldolase)    |
| 5.84      | 6.87       | 10.73  | 1.74E-03 | Symbols: TMP-C, PIP1;4, PIP1E   plasma membrane intrinsic protein 1;4   chr4:186569-18 |
| 5.38      | 6.21       | 6.75   | 4.73E-02 | Symbols: PIP2B, PIP2;2   plasma membrane intrinsic protein 2   chr2:15613624-15614791  |
| 6.91      | 7.67       | 5.80   | 3.66E-04 | Symbols:   Mannose-binding lectin superfamily protein   chr5:14090825-14092808 FORW/   |
| 5.19      | 5.95       | 5.69   | 1.11E-01 | Symbols: MED19A   MED19A;BEST Arabidopsis thaliana protein match is: unknown prote     |
| 5.60      | 6.36       | 5.67   | 2.41E-01 | Symbols:   Translation protein SH3-like family protein   chr1:3136407-3137430 REVERSE  |
| 5.86      | 6.59       | 5.46   | 2.91E-01 | LYSC_CHICK   Lysozyme C (EC 3.2.1.17) (1,4-beta-N-acetylmuramidase C) (Allergen Gal    |
| 5.55      | 6.26       | 5.21   | 2.42E-01 | Symbols:   Translation protein SH3-like family protein   chr3:18504311-18504751 FORWA  |
| 5.69      | 6.36       | 4.69   | 3.21E-01 | Symbols:   Ribosomal protein S5 domain 2-like superfamily protein   chr5:6090128-60906 |
| 4.89      | 5.49       | 4.05   | 9.96E-02 | Symbols: PIP2A, PIP2, PIP2;1   plasma membrane intrinsic protein 2A   chr3:19803906-19 |
| 7.24      | 7.82       | 3.74   | 1.39E-01 | GFP_AEQVI   Green fluorescent protein;eGFP from pK7WGF2;eGFP from pK7FWG2;GF           |
