# Supplementary material
Source: PubMed Central journal article supplement (PMC7612300)
Supplement: EMS140927-supplement-Extended_Data_Table_4.pdf [file EMS140927-supplement-Extended_Data_Table_4.pdf]

**Extended Data Table 4. Primers used for cloning and qPCR analysis**

| Name        | Direction | Sequence                                                                                  | Gene ID                 | Purpose                                                       |
|-------------|-----------|-------------------------------------------------------------------------------------------|-------------------------|---------------------------------------------------------------|
| pTMK1       | Fw        | GGGGACAACCTTTGTATAGAAAAGTTGCATCGTTTGGAACAGATCTTTCAGC                                      | AT1G66150               | for cloning TMK1 promoter                                     |
|             | Rv        | GGGGACTGCTTTTTGTACAAAACCTGCAGCTTGAAGAAACAGAGATTGAAG                                       |                         |                                                               |
| gTMK1       | Fw        | GGGGACAAGTTTGTACAAAAAAGCAGGCTCAATGAAGAAAAAGAAGAACCTT                                      | AT1G66150               | for cloning genomic TMK1                                      |
|             | Rv        | GGGGACCACTTTGTACAAGAAAGCTGGGTCTCGTCCATCTACTGAAGTGAAT                                      |                         |                                                               |
| cTMK1       | Fw        | caccATGAAGAAAAGAAGAACCTTTC                                                                | AT1G66150               | for cloning cDNA of TMK1                                      |
|             | Rv        | TCGTCCATCTACTGAAGTGAATG                                                                   |                         |                                                               |
| cTMK1-K616R | Fw        | CGAAGATTGCGGTTAGGAGAATGGAGAATGG                                                           | AT1G66150               | for cloning cDNA of TMK1-K616R                                |
|             | Rv        | CCATTCTCCATTCTCTAACC GCAATCTTCG                                                           |                         |                                                               |
| cTMK1-K616E | Fw        | CGAAGATTGCGGTTGAGAGAATGGAGAATG                                                            | AT1G66150               | for cloning cDNA of TMK1-K616E                                |
|             | Rv        | CATTCTCCATTCTCTCAACCGCAATCTTCG                                                            |                         |                                                               |
| TAS_AHA     | Fw        | CCTTTTTCTCCATGACCCTATGCATTTTACCAA                                                         | same gene ID as in qPCR | for cloning syn-tasiRNA target sequence targeting AHA1/2/7/11 |
|             | Rv        | GTTCTTGGTAAAAATGCATAGGGTCATGGAGAAAAAGGAGAGTAAGAATGTGAAAAAGTTGCAGGAGAATGTGAAAAAGCTGCAGGAGA |                         |                                                               |
| qEF1a       | Fw        | TGAGCACGCTCTTCTTGCTTCA                                                                    | AT5G60390               | for qrtPCR                                                    |
|             | Rv        | GGTGGTGGCATCCATCTTGTTACA                                                                  |                         |                                                               |
| qAHA1       | Fw        | GCCAGCTTGTTTGACAACAGGAC                                                                   | AT2G18960               | for qrtPCR                                                    |
|             | Rv        | TTTGGCTGCAGACCGTGCAATG                                                                    |                         |                                                               |
| qAHA2       | Fw        | ACATTGACGGCAGTGGTAACTGG                                                                   | AT4G30190               | for qrtPCR                                                    |
|             | Rv        | TTTGGCAAGTTCGAGGATCTGC                                                                    |                         |                                                               |
| qAHA7       | Fw        | TGCTCTAAGTGGCAAATCATGGG                                                                   | AT3G60330               | for qrtPCR                                                    |
|             | Rv        | TTCTTTCCTGTGAGTGCAATCCTC                                                                  |                         |                                                               |
| qAHA11      | Fw        | CATTGGCGGTATCCCAATTGCC                                                                    | AT5G62670               | for qrtPCR                                                    |
|             | Rv        | CCTCTGGTTATTGCTCCCTGCTG                                                                   |                         |                                                               |
