# Supplementary material
Source: PubMed Central journal article supplement (PMC7612300)

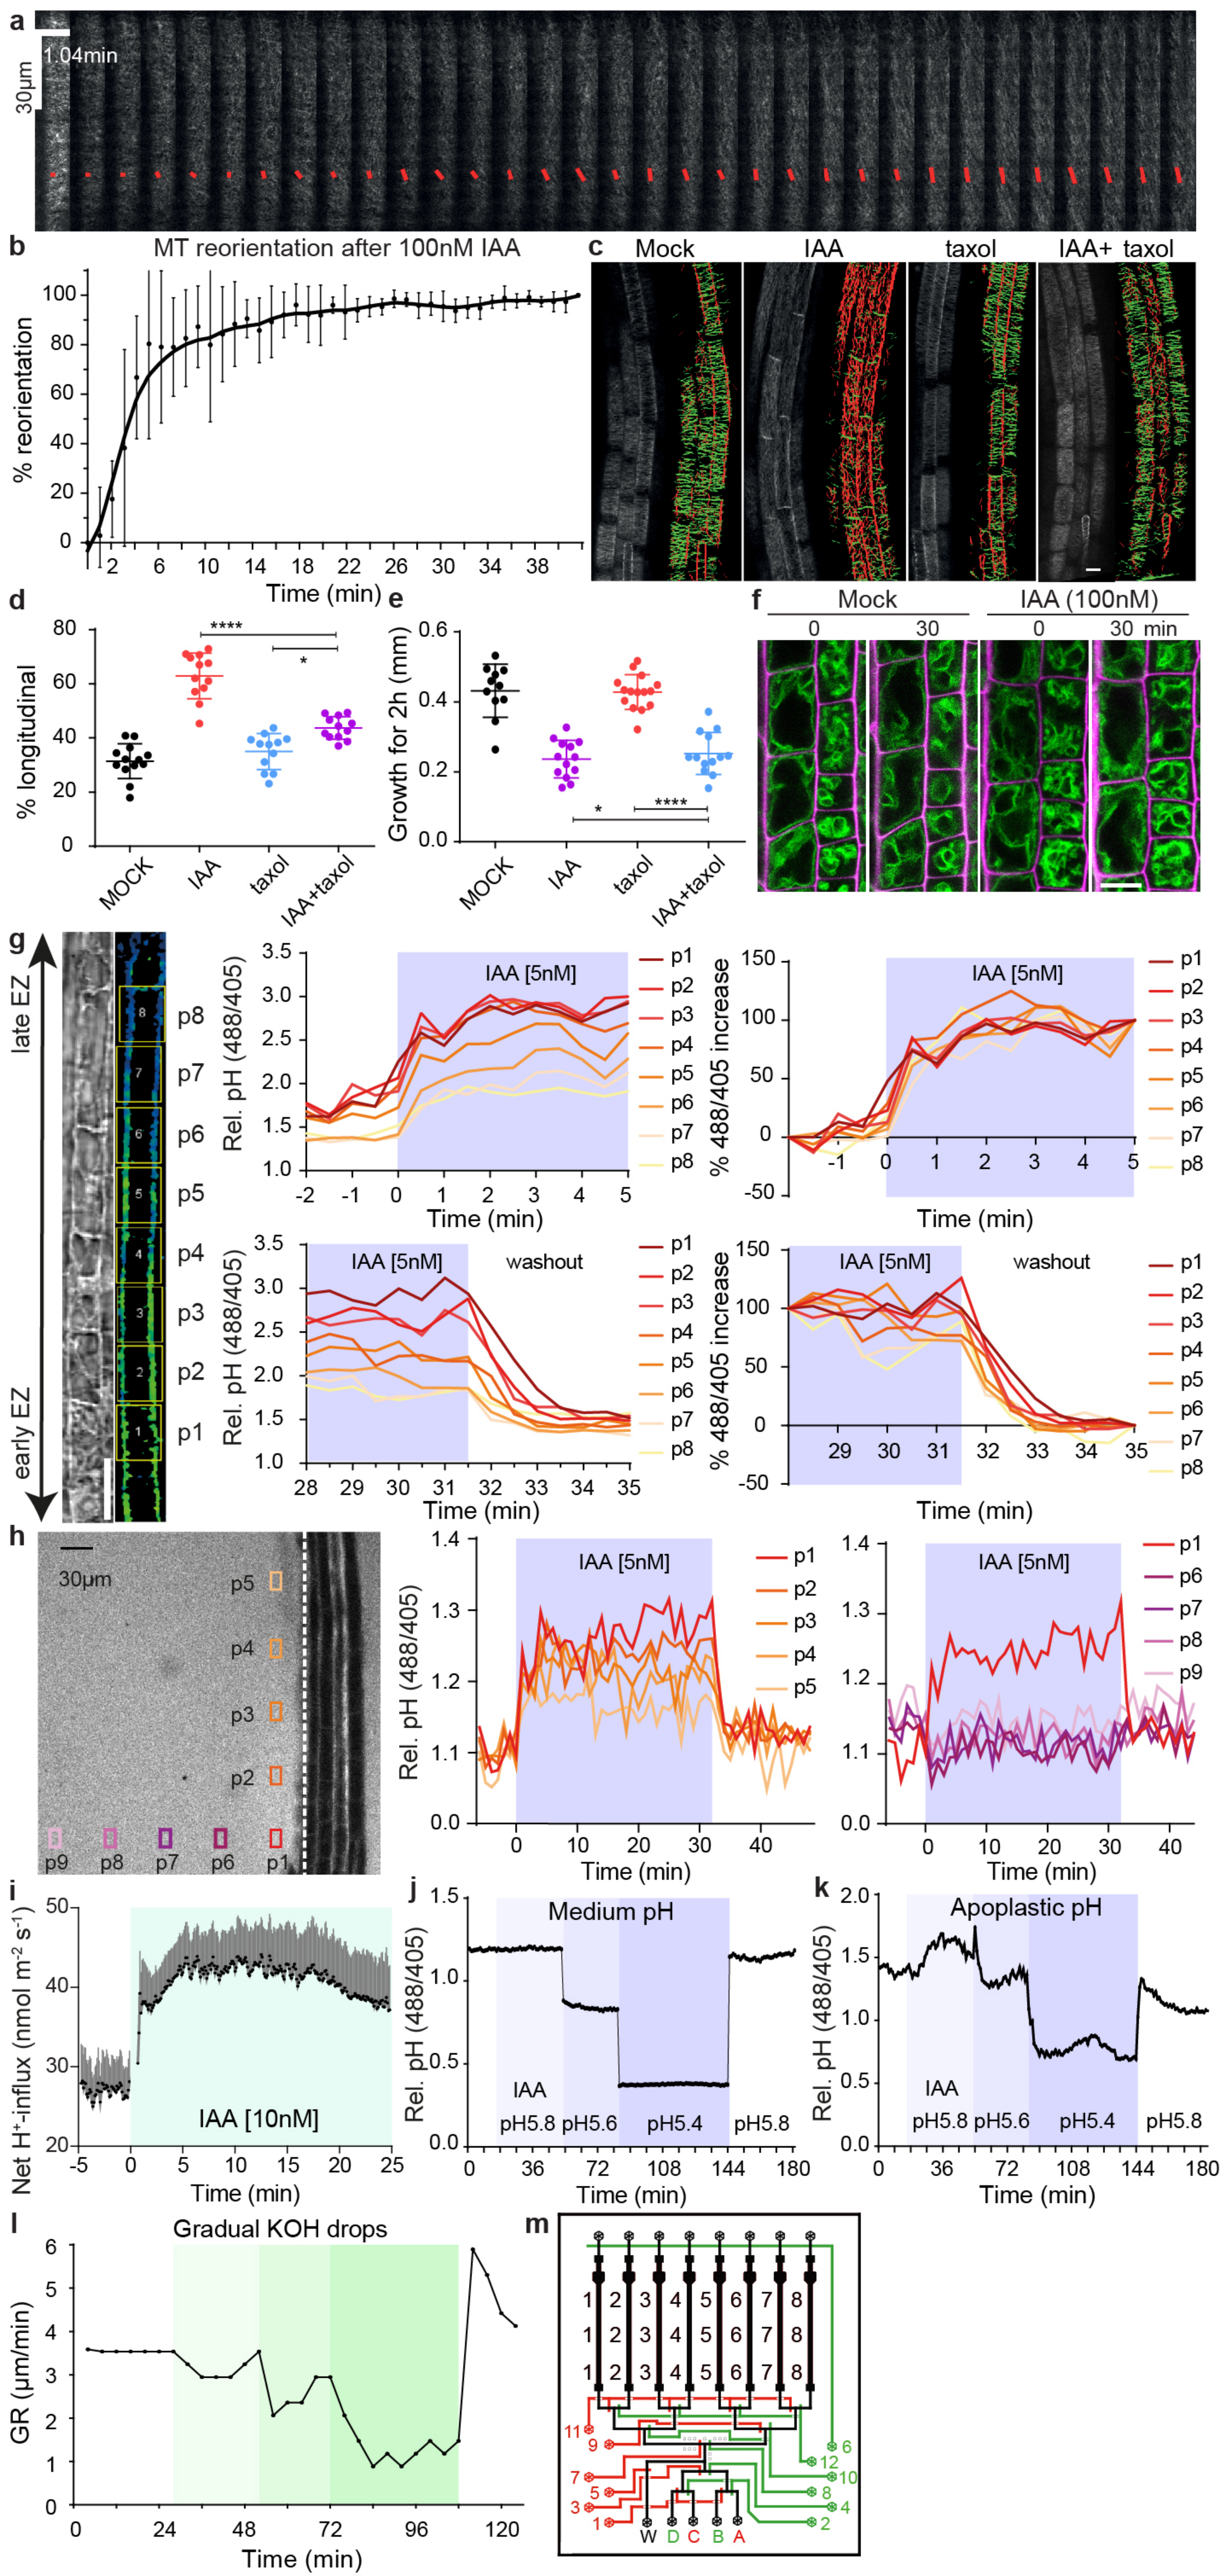

Supplement: EMS140927-supplement-Extended_Data_Figure_1.pdf [file EMS140927-supplement-Extended_Data_Figure_1.pdf]

Extended Data Fig. 2

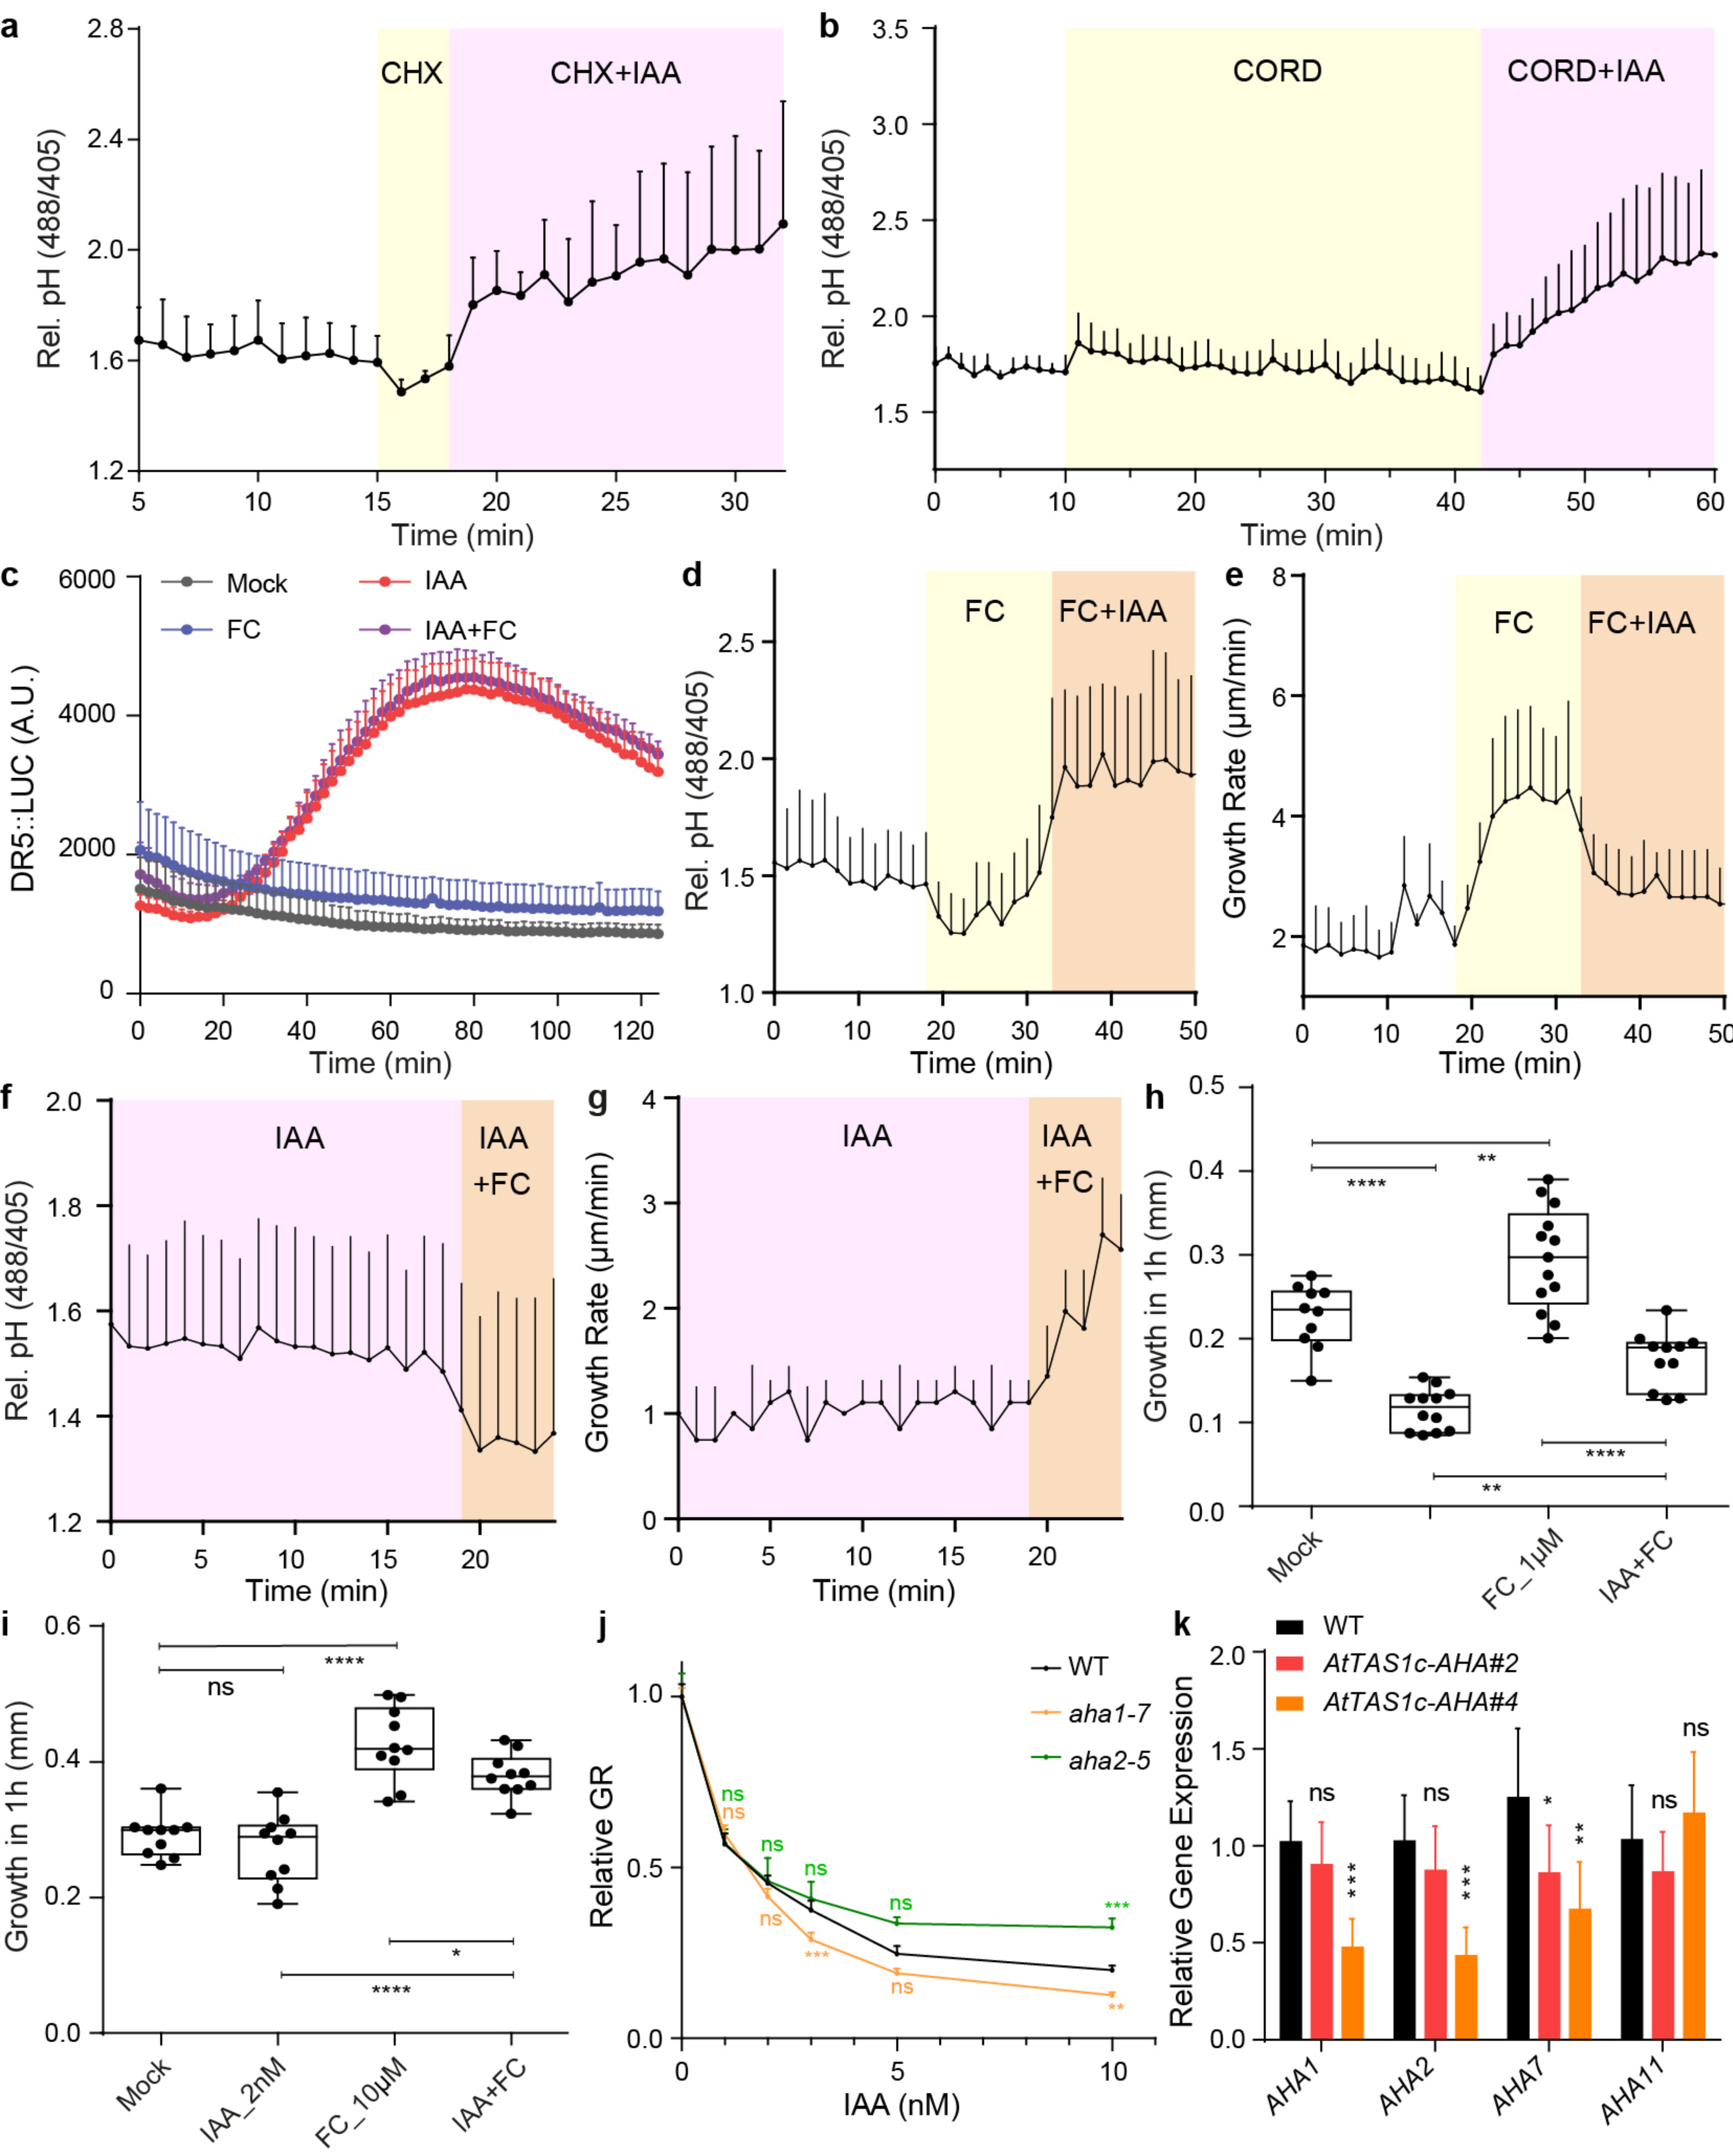

Supplement: EMS140927-supplement-Extended_Data_Figure_2.pdf [file EMS140927-supplement-Extended_Data_Figure_2.pdf]

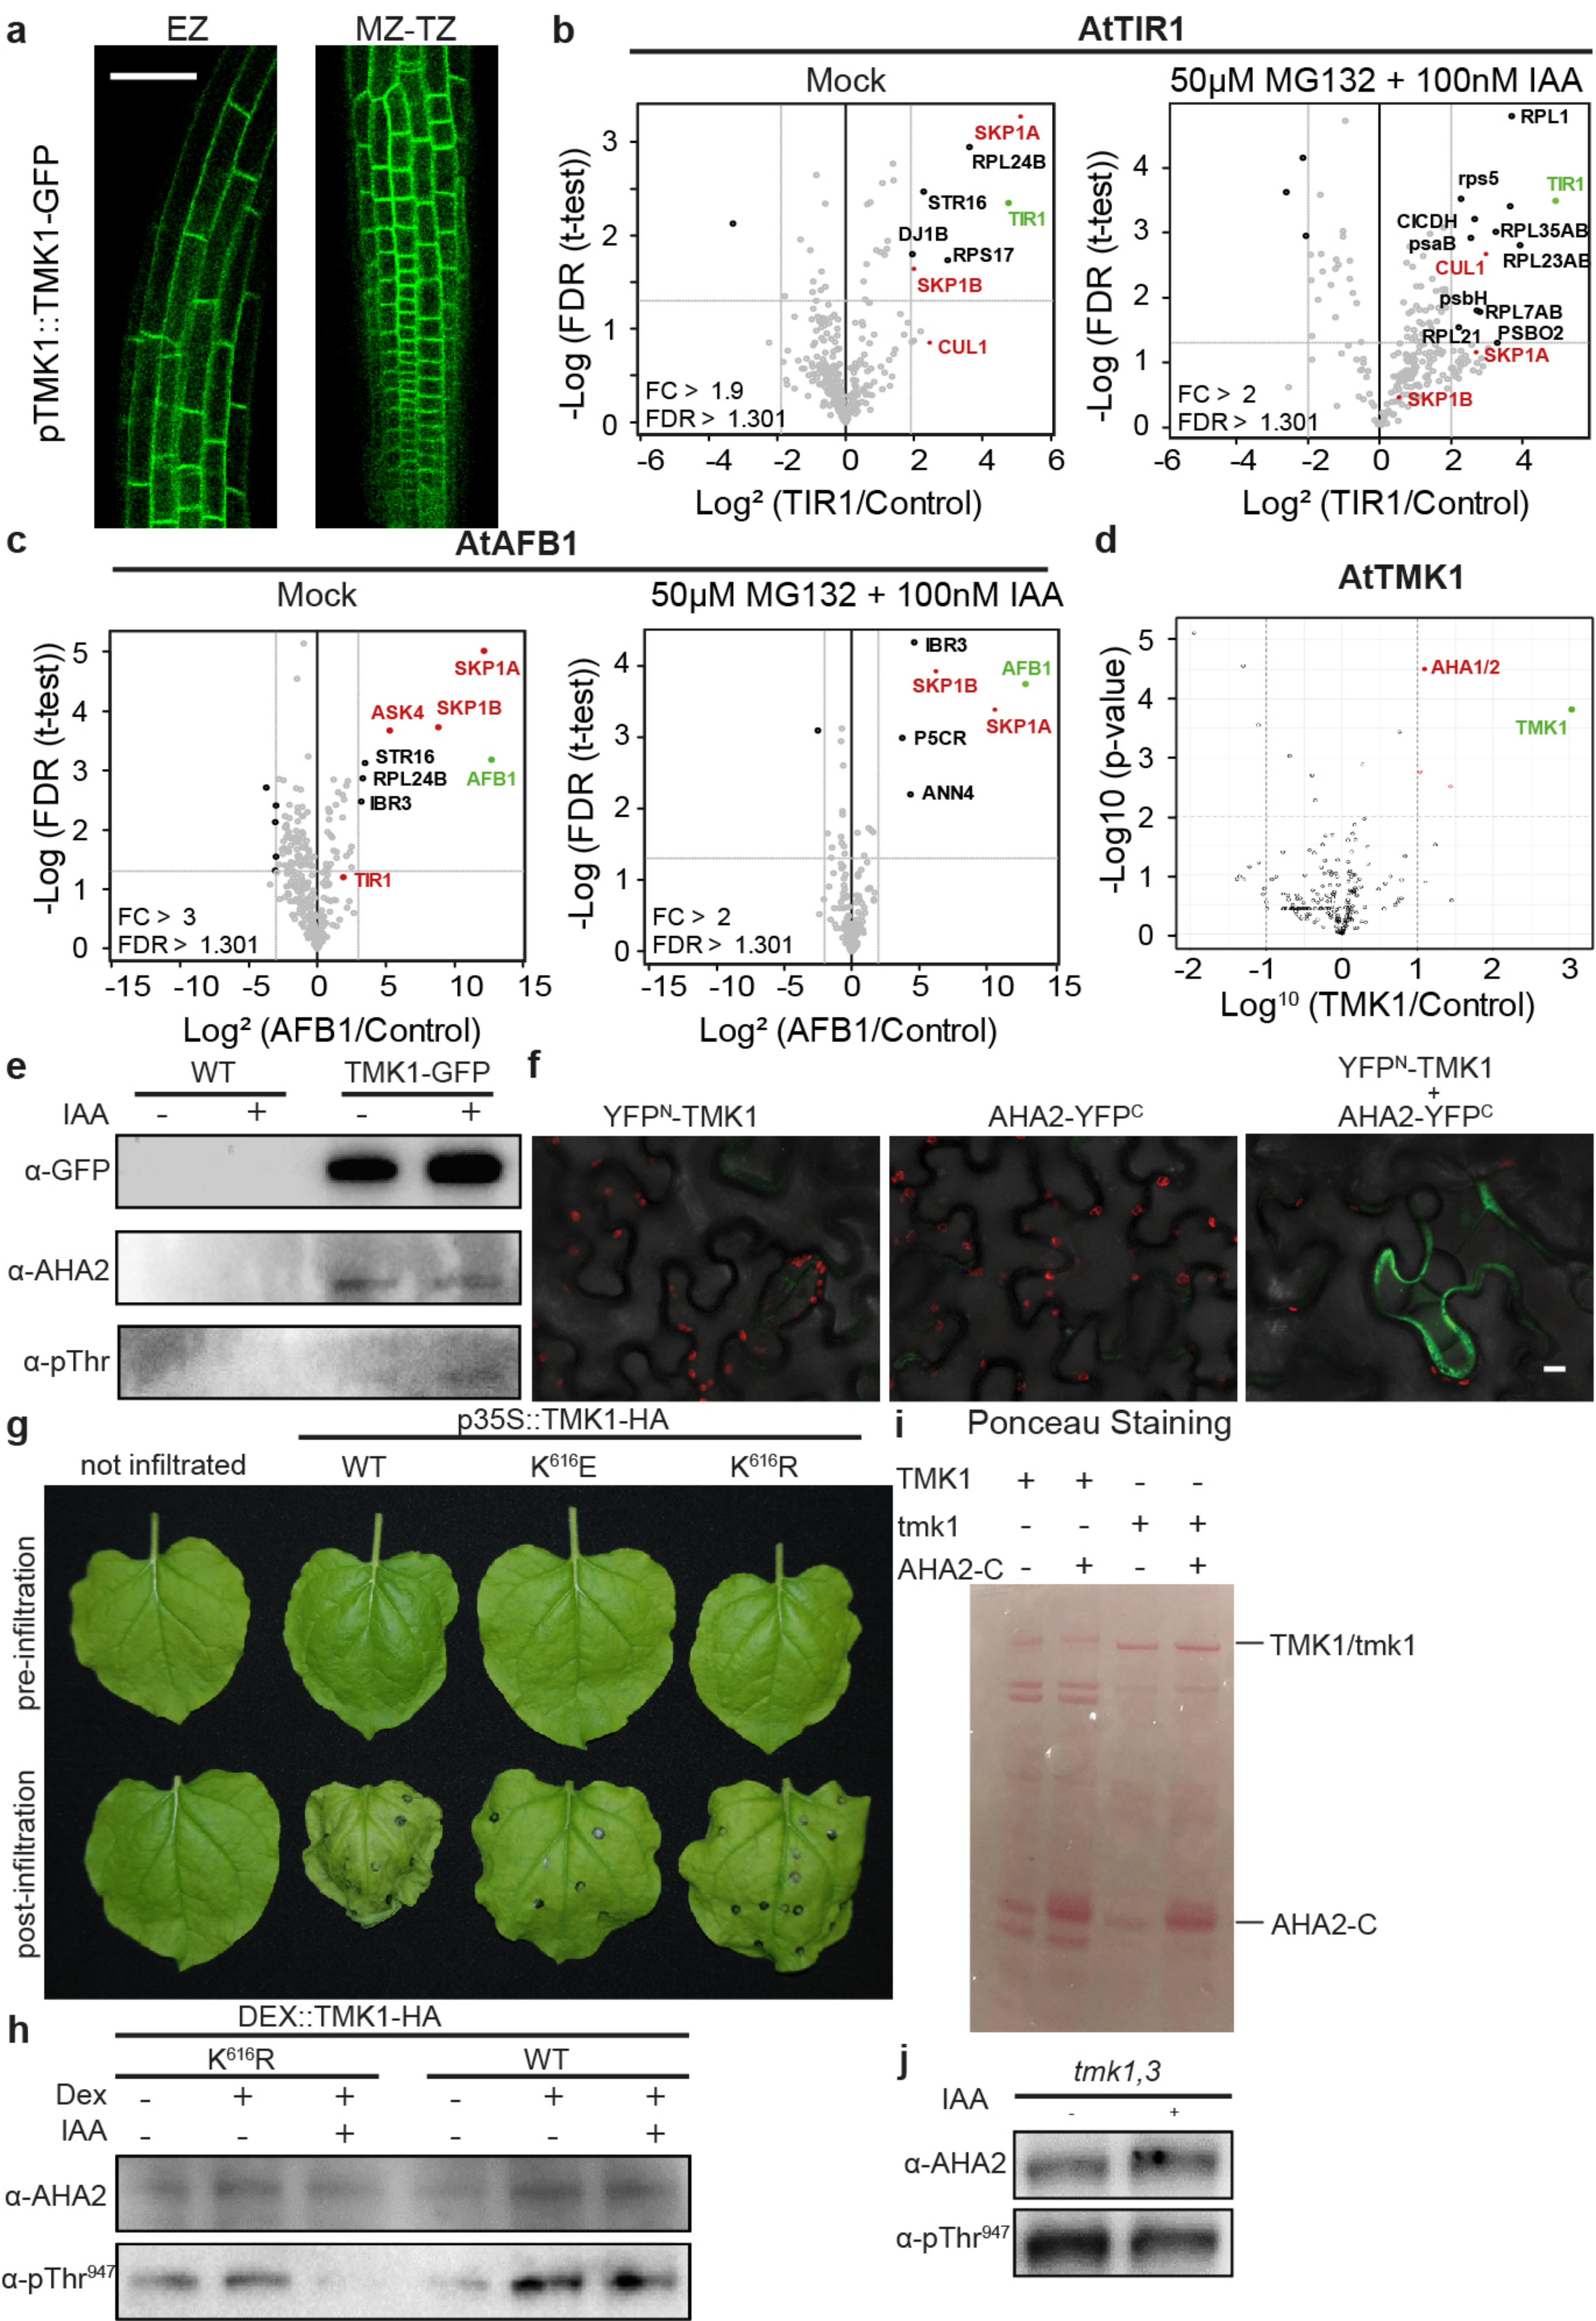

Supplement: EMS140927-supplement-Extended_Data_Figure_3.pdf [file EMS140927-supplement-Extended_Data_Figure_3.pdf]

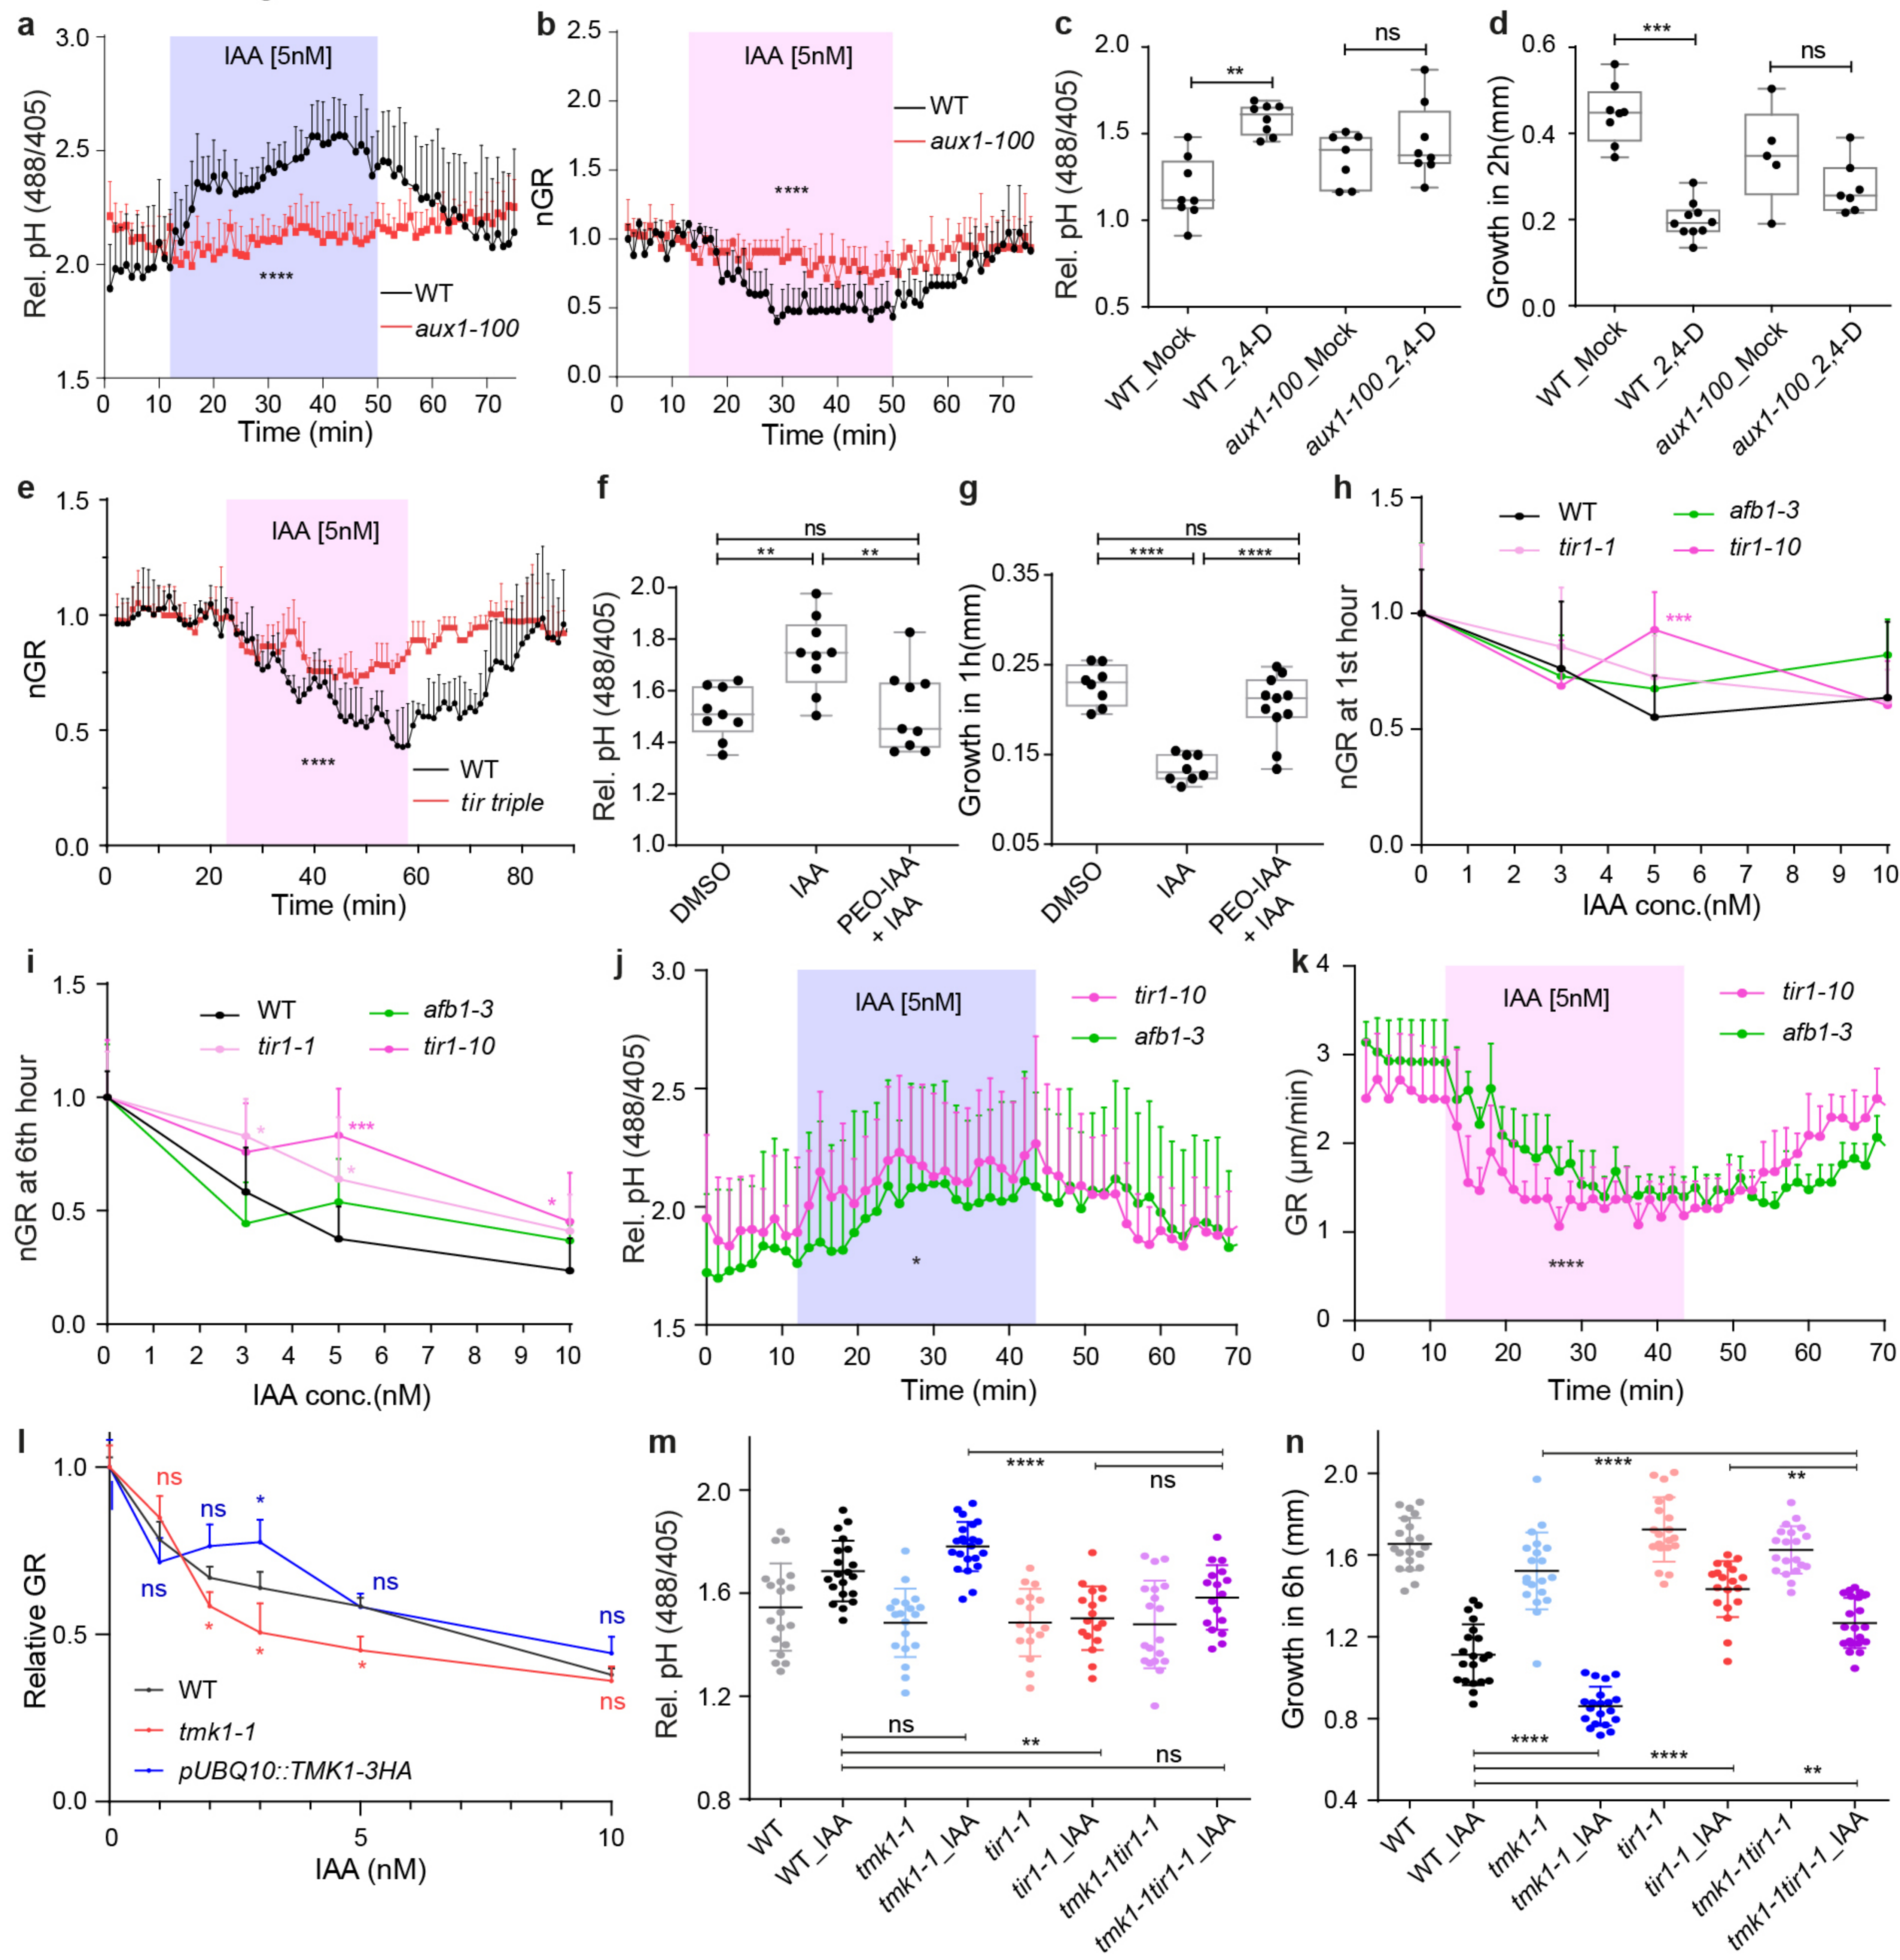

Supplement: EMS140927-supplement-Extended_Data_Figure_4.pdf [file EMS140927-supplement-Extended_Data_Figure_4.pdf]

Extended Data Fig. 5

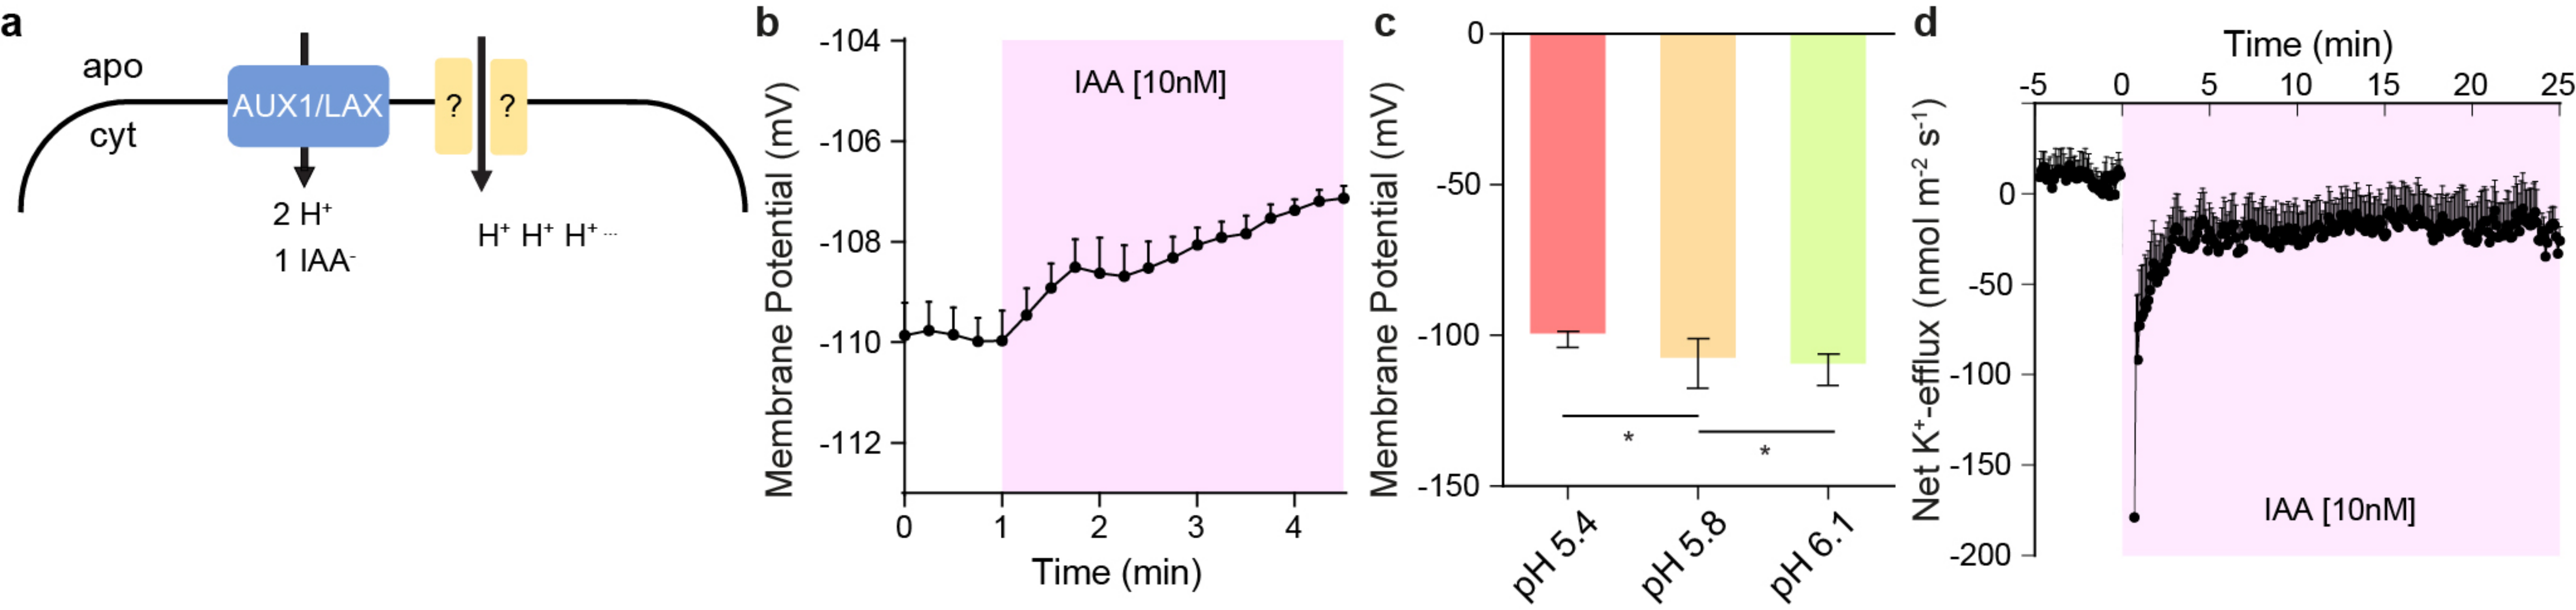

Supplement: EMS140927-supplement-Extended_Data_Figure_5.pdf [file EMS140927-supplement-Extended_Data_Figure_5.pdf]

Extended Data Fig. 6

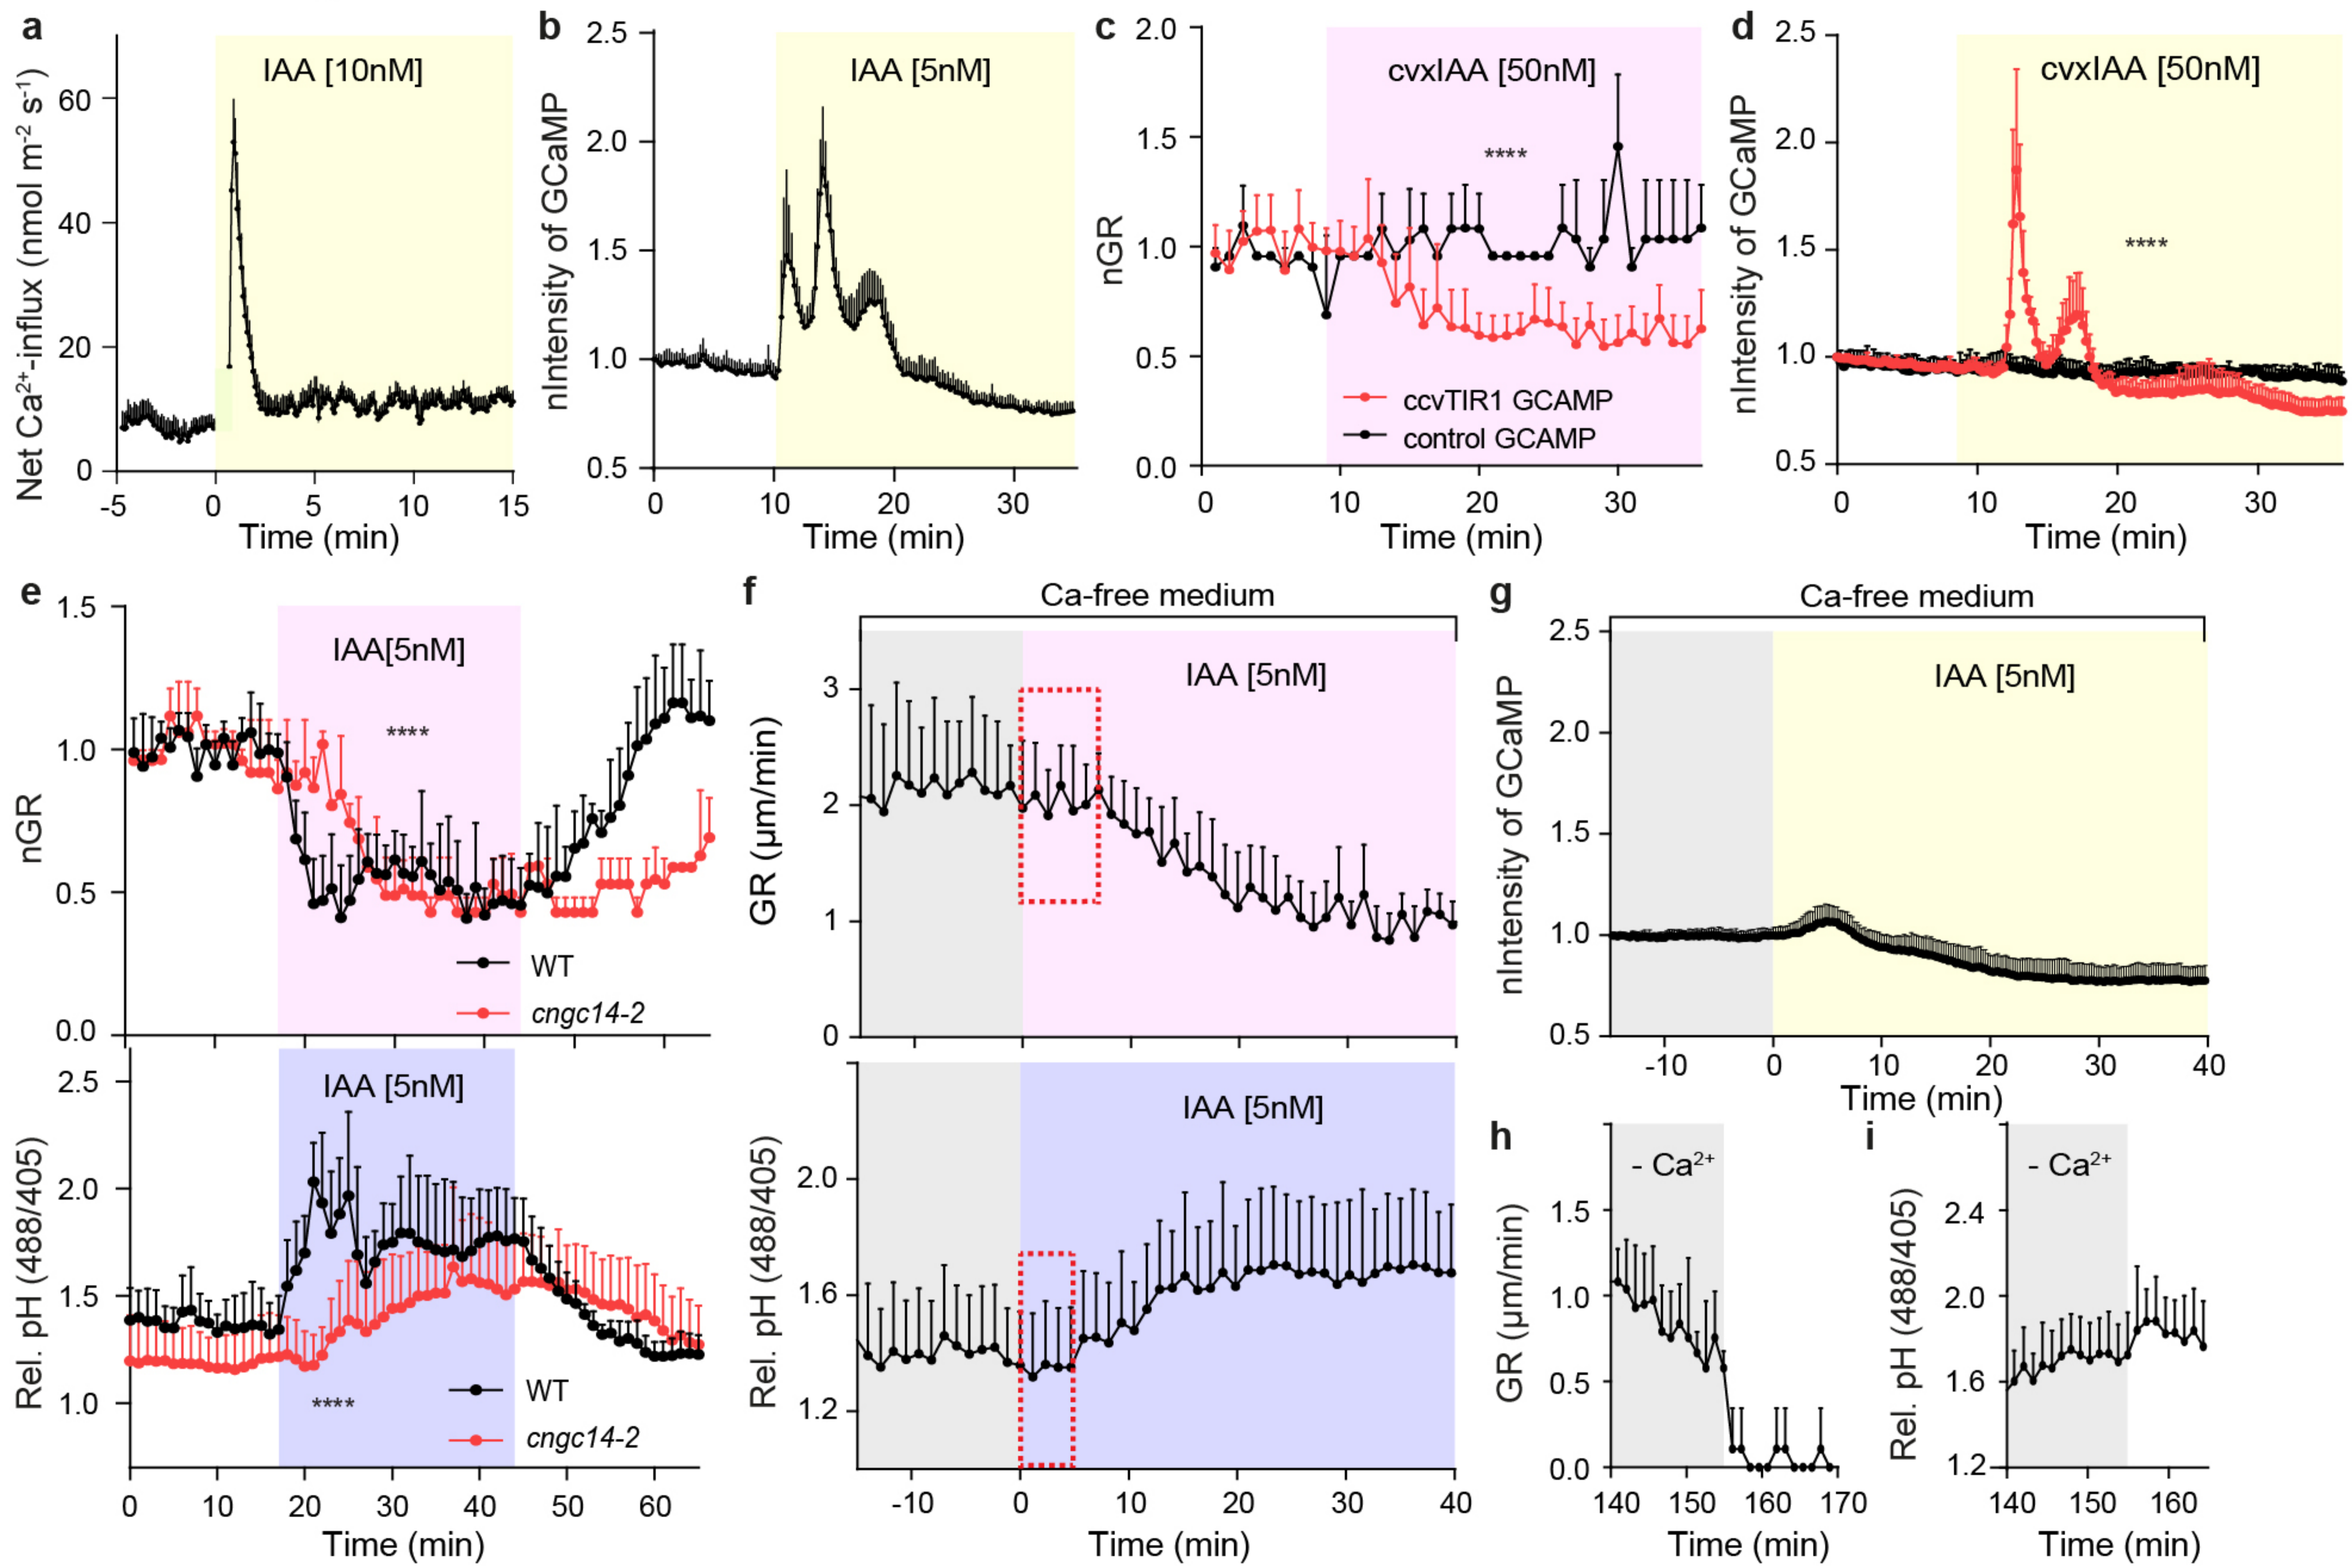

Supplement: EMS140927-supplement-Extended_Data_Figure_6.pdf [file EMS140927-supplement-Extended_Data_Figure_6.pdf]
